# Supplementary material for: Synthesis and structural, redox and photophysical properties of tris-(2,5-di(2-pyridyl)pyrrolide) lanthanide complexes
Source: Royal Society of Chemistry journal article supplement (doi:10.1039/c9dt01262a), 2019-01-01
Supplement: c9dt01262a1.pdf [file c9dt01262a1.pdf]

## **Synthesis and Structural, Redox and Photophysical Properties of Tris-(2,5-di(2-pyridyl)pyrrolide) Lanthanide Complexes**

**James N. McPherson,<sup>a</sup> Laura Abad Galan,<sup>b</sup> Hasti Iranmanesh,<sup>a</sup> Max Massi<sup>b\*</sup> and Stephen B. Colbran<sup>a\*</sup>**

<sup>a</sup>School of Chemistry, University of New South Wales, NSW 2052 Australia;

<sup>b</sup>Department of Chemistry, Curtin University, WA 6102 Australia

---

### Electronic Supplementary Information

## SC-XRD structures

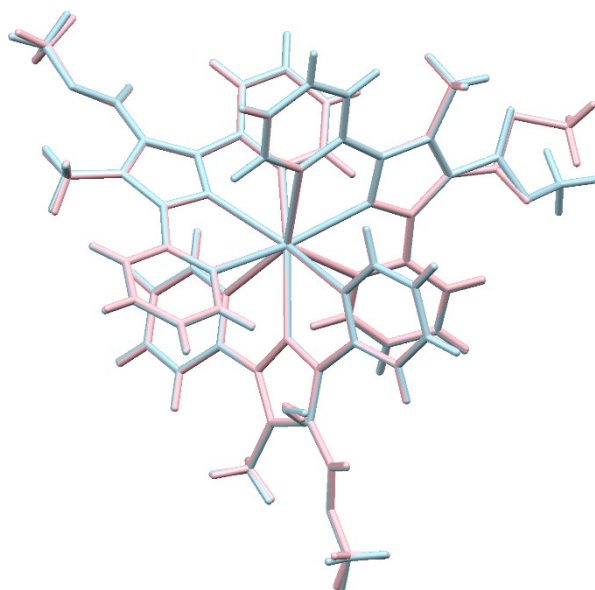

**Fig S1.** Overlaid SC-XRD structures of [Sm(dpp<sup>CO<sub>2</sub>Me,Me</sup>)<sub>3</sub>] (pink) and [Eu(dpp<sup>CO<sub>2</sub>Me,Me</sup>)<sub>3</sub>] (light blue) by matching the Ln(III) centre and 9 coordinating N atoms (RMSD = 0.0119 Å).

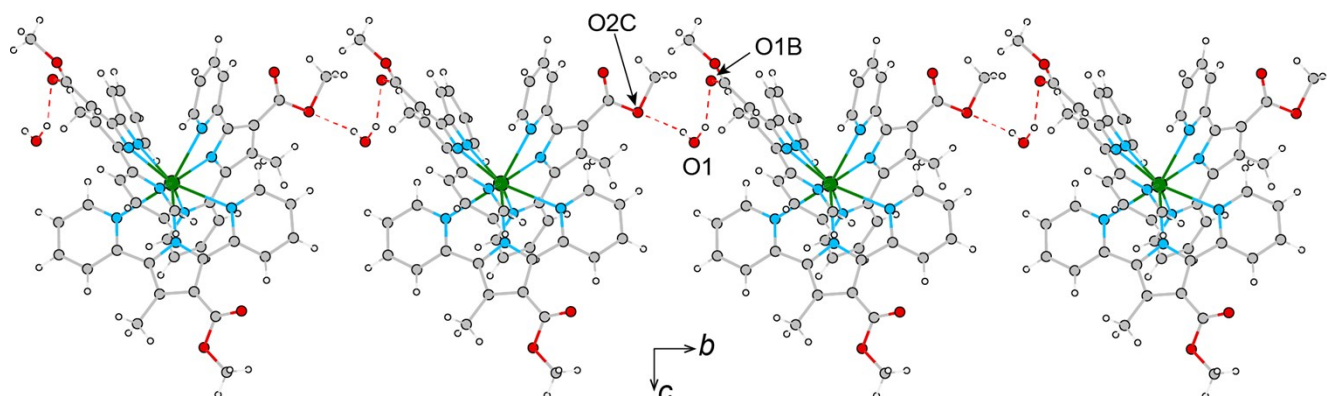

**Fig S2.** H-bonding network with the lattice water molecule linking neighbouring [Ln(dpp<sup>CO<sub>2</sub>Me,Me</sup>)<sub>3</sub>] complex molecules (Ln = Sm, Eu) down the *b* axis. Key distances and angles: Ln = Sm: O2C...O1 2.90(1) Å, O1...O1B 2.91(1) Å, and O2C–O1–O1B 92.8(4); Ln = Eu: O1C'...O1 2.91(3) Å, O1...O1B 2.92(2) Å, and O1C'–O1–O1B 98.3(7)°.

**Table S1. Experimental details**

| Complex                                                                                                        | [La(dpp <sup>Me,Me</sup> ) <sub>3</sub> ]                                             | [Sm(dpp <sup>CO<sub>2</sub>Me,Me</sup> ) <sub>3</sub> ]                              | [Eu(dpp <sup>CO<sub>2</sub>Me,Me</sup> ) <sub>3</sub> ]                                |
|----------------------------------------------------------------------------------------------------------------|---------------------------------------------------------------------------------------|--------------------------------------------------------------------------------------|----------------------------------------------------------------------------------------|
| CIF name                                                                                                       | p1bar_a                                                                               | james_sm1_a                                                                          | James_Eu_June18_0m_a                                                                   |
| Crystal data                                                                                                   |                                                                                       |                                                                                      |                                                                                        |
| Chemical formula                                                                                               | C <sub>48</sub> H <sub>42</sub> LaN <sub>9</sub> ·1.5(C <sub>6</sub> H <sub>6</sub> ) | 2(C <sub>51</sub> H <sub>42</sub> N <sub>9</sub> O <sub>6</sub> Sm)·H <sub>2</sub> O | C <sub>51</sub> H <sub>42</sub> EuN <sub>9</sub> O <sub>6</sub> ·0.5(H <sub>2</sub> O) |
| <i>M</i> <sub>r</sub>                                                                                          | 1000.98                                                                               | 2072.58                                                                              | 1066.48                                                                                |
| Crystal system, space group                                                                                    | Triclinic, <i>P</i> <sup>-</sup> 1                                                    | Monoclinic, <i>P</i> 2 <sub>1</sub> / <i>n</i>                                       | Monoclinic, <i>P</i> 2 <sub>1</sub> / <i>n</i>                                         |
| Temperature (K)                                                                                                | 100                                                                                   | 100                                                                                  | 99.95                                                                                  |
| <i>a</i> , <i>b</i> , <i>c</i> (Å)                                                                             | 12.928 (3), 13.980 (3), 14.100 (3)                                                    | 17.177 (3), 13.222 (3), 19.402 (4)                                                   | 17.3254(12), 13.3245(9), 19.4895(13)                                                   |
| α, β, γ (°)                                                                                                    | 80.97 (3), 83.88 (3), 70.72 (3)                                                       | 90.85 (3)                                                                            | 90.717(2)                                                                              |
| <i>V</i> (Å <sup>3</sup> )                                                                                     | 2371.5 (9)                                                                            | 4406.0 (15)                                                                          | 4498.8(5)                                                                              |
| <i>Z</i>                                                                                                       | 2                                                                                     | 2                                                                                    | 4                                                                                      |
| Radiation type                                                                                                 | Mo <i>K</i> α                                                                         | Mo <i>K</i> α                                                                        | Mo <i>K</i> □                                                                          |
| μ (mm <sup>-1</sup> )                                                                                          | 0.95                                                                                  | 1.40                                                                                 | 1.458                                                                                  |
| Crystal size (mm)                                                                                              | 0.02 × 0.01 × 0.01                                                                    | 0.02 × 0.02 × 0.02                                                                   | 0.1 × 0.04 × 0.01                                                                      |
| Data collection                                                                                                |                                                                                       |                                                                                      |                                                                                        |
| Diffractometer                                                                                                 | ADSC Quantum 210r                                                                     | ADSC Quantum 210r                                                                    | Bruker D8 Quest                                                                        |
| Absorption correction                                                                                          | –                                                                                     | –                                                                                    | SADABS                                                                                 |
| No. of measured, independent and observed [ <i>I</i> > 2σ( <i>I</i> )] reflections                             | 39500, 10228, 9722                                                                    | 65218, 9559, 8469                                                                    | 146595, 7935                                                                           |
| <i>R</i> <sub>int</sub>                                                                                        | 0.018                                                                                 | 0.029                                                                                | 0.1555                                                                                 |
| (sin θ/λ) <sub>max</sub> (Å <sup>-1</sup> )                                                                    | 0.658                                                                                 | 0.641                                                                                | 0.595                                                                                  |
| Refinement                                                                                                     |                                                                                       |                                                                                      |                                                                                        |
| <i>R</i> [ <i>F</i> <sup>2</sup> > 2σ( <i>F</i> <sup>2</sup> )], <i>wR</i> ( <i>F</i> <sup>2</sup> ), <i>S</i> | 0.024, 0.061, 1.07                                                                    | 0.039, 0.103, 1.14                                                                   | 0.0479, 0.1249, 1.076                                                                  |
| No. of reflections                                                                                             | 10228                                                                                 | 9559                                                                                 | 7935                                                                                   |
| No. of parameters                                                                                              | 611                                                                                   | 651                                                                                  | 653                                                                                    |
| No. of restraints                                                                                              | –                                                                                     | 11                                                                                   | 49                                                                                     |
| H-atom treatment                                                                                               | H-atom parameters constrained                                                         | H-atom parameters constrained                                                        | H-atom parameters constrained                                                          |
| Δ <sub>max</sub> , Δ <sub>min</sub> (e Å <sup>-3</sup> )                                                       | 0.51, -1.40                                                                           | 0.92, -1.16                                                                          | 0.94, -0.85                                                                            |

Computer programs: Blucce (McPhillips, 2002), XDS (Kabsch, 1993), *SHELXT* (Sheldrick, 2015), *SHELXL* (Sheldrick, 2015), Olex2 (Dolomanov *et al.*, 2009).

# NMR Spectra

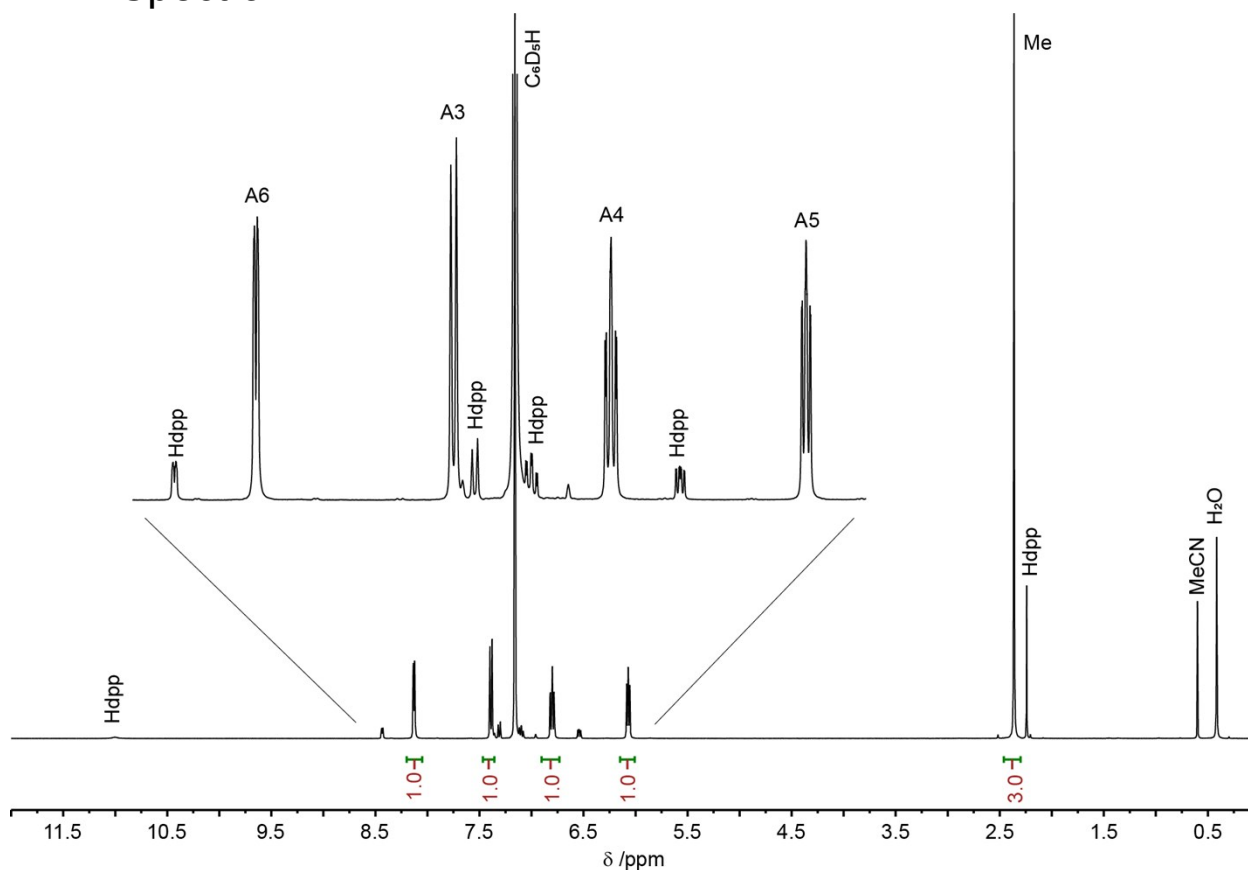

**Fig. S3.**  $^1\text{H}$  NMR (400 MHz,  $\text{C}_6\text{D}_6$ ) spectrum of  $[\text{La}(\text{Me},\text{Me-dpp})_3]$ .

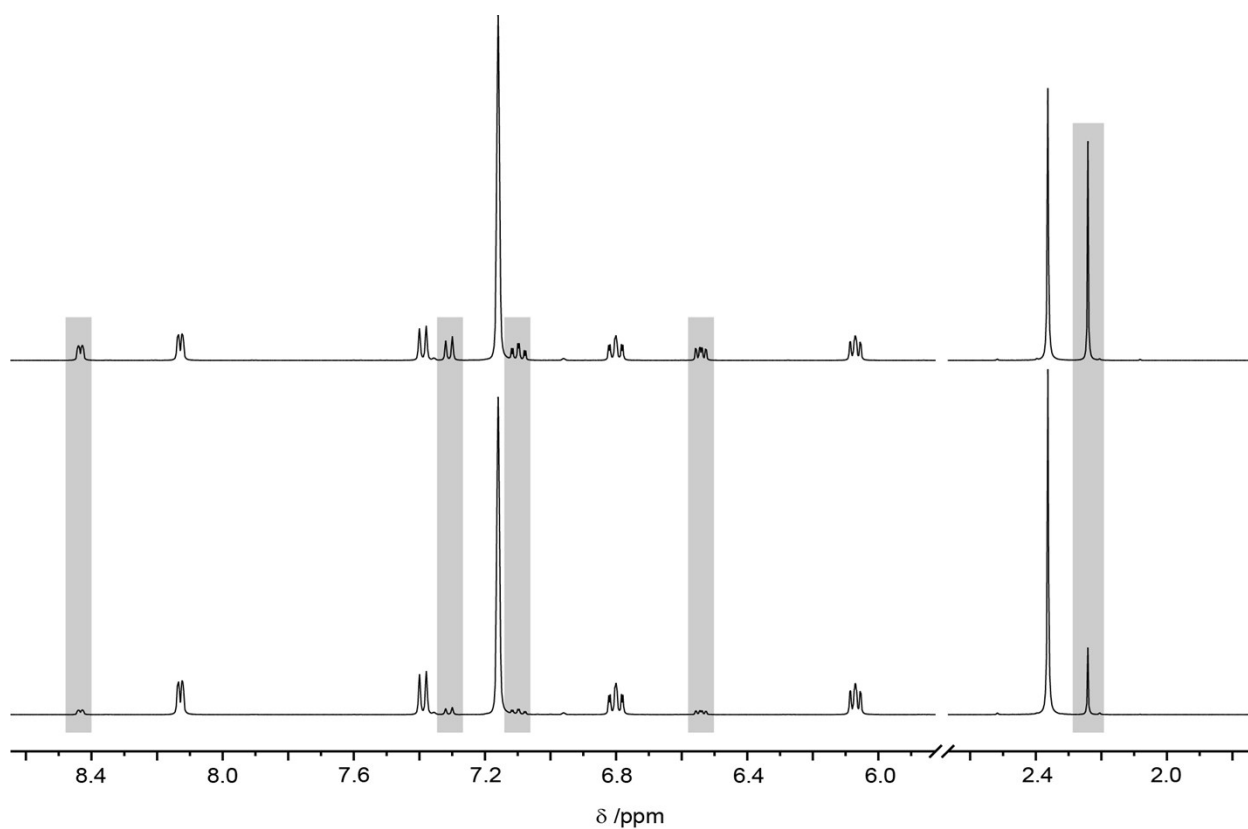

**Fig. S4.**  $^1\text{H}$  NMR (400 MHz,  $\text{C}_6\text{D}_6$ ) spectra of  $[\text{La}(\text{dpp}^{\text{Me},\text{Me}})_3]$ : after 20 minutes in solution (bottom) and after 6 hours in solution (top). The signals, which correspond to unbound  $\text{dpp}^{\text{Me},\text{Me}}\text{H}$ —and increase over time—have been highlighted by grey regions.

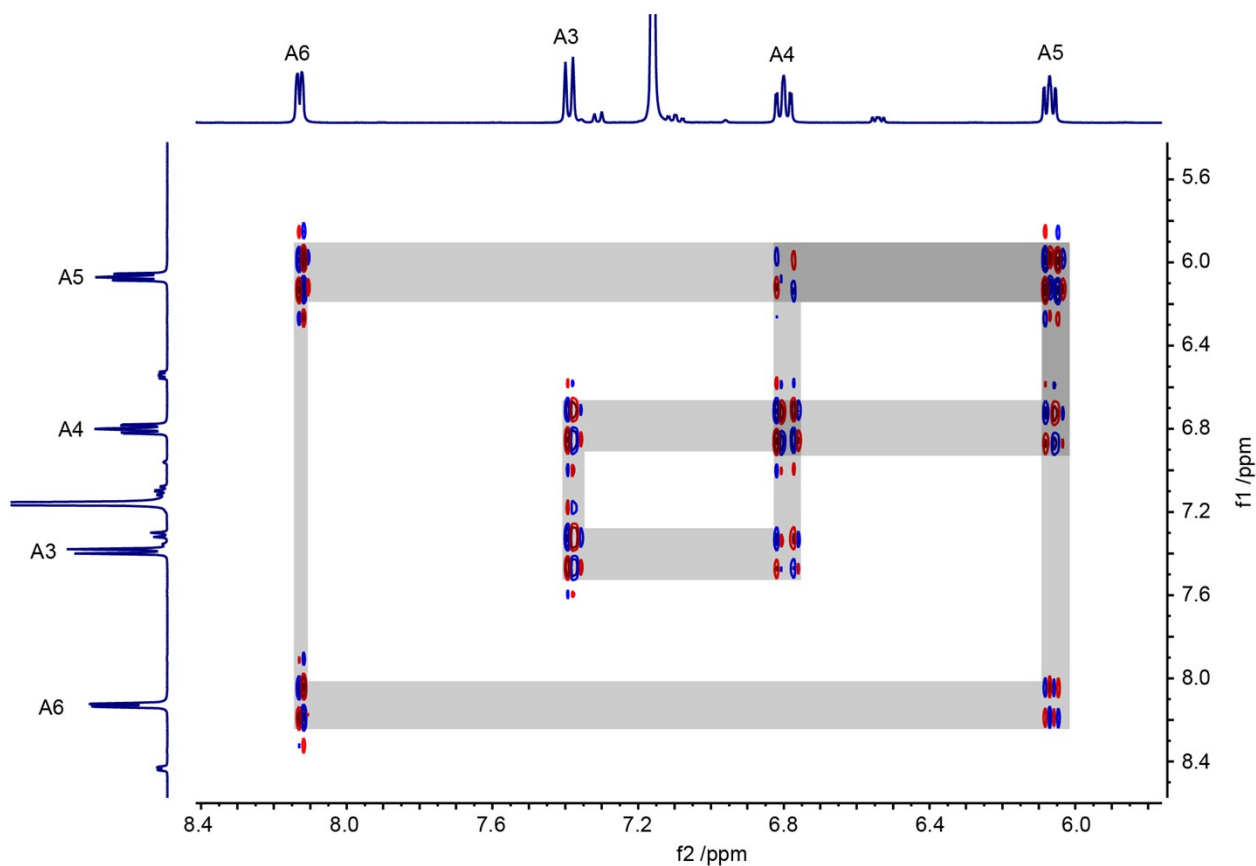

**Fig S5.**  $^1\text{H}$ - $^1\text{H}$  COSY NMR (400 MHz,  $\text{C}_6\text{D}_6$ ) spectrum of  $[\text{La}^{(\text{Me},\text{Me})\text{dpp}}]_3$ .

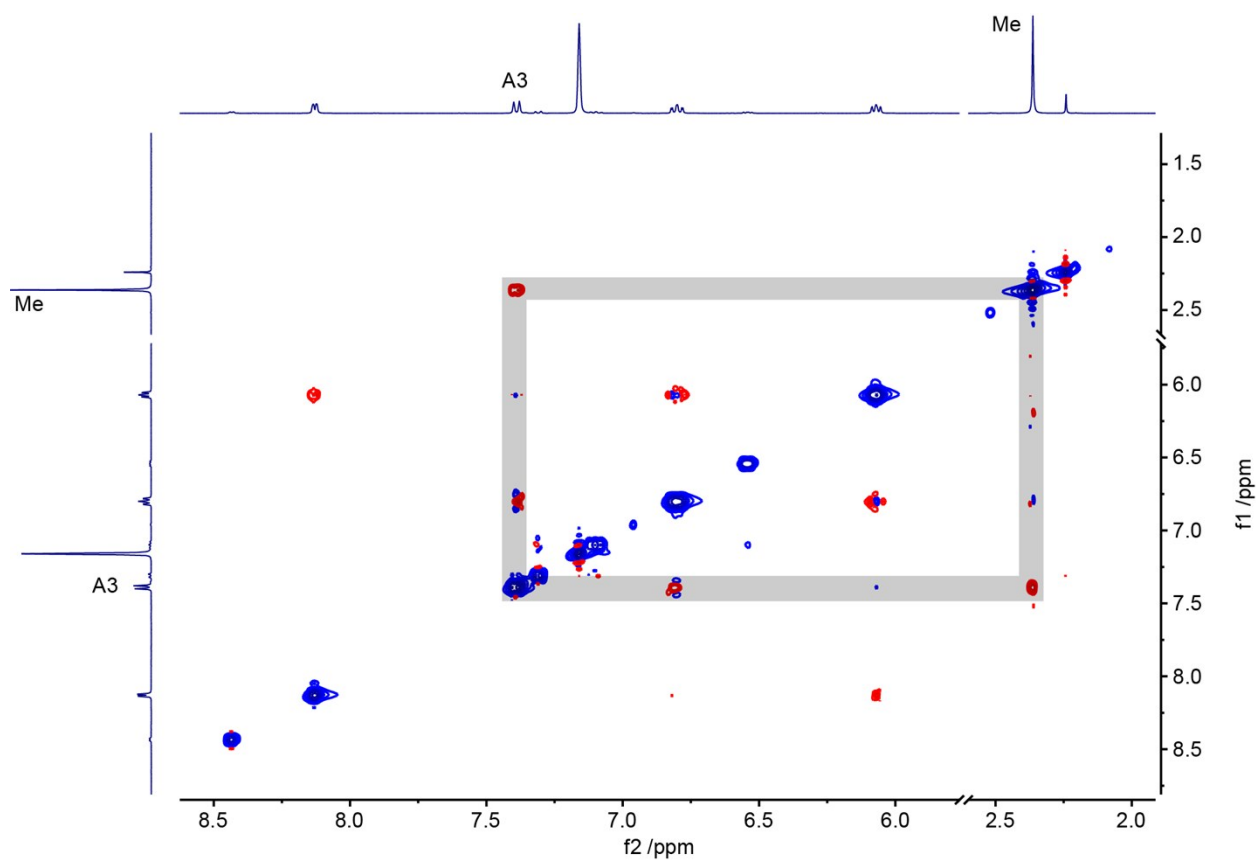

**Fig S6.**  $^1\text{H}$ - $^1\text{H}$  nOeSY NMR (400 MHz,  $\text{C}_6\text{D}_6$ ) spectrum of  $[\text{La}^{(\text{Me},\text{Me})\text{dpp}}]_3$ . The key interaction (A3 – Me) has been highlighted.

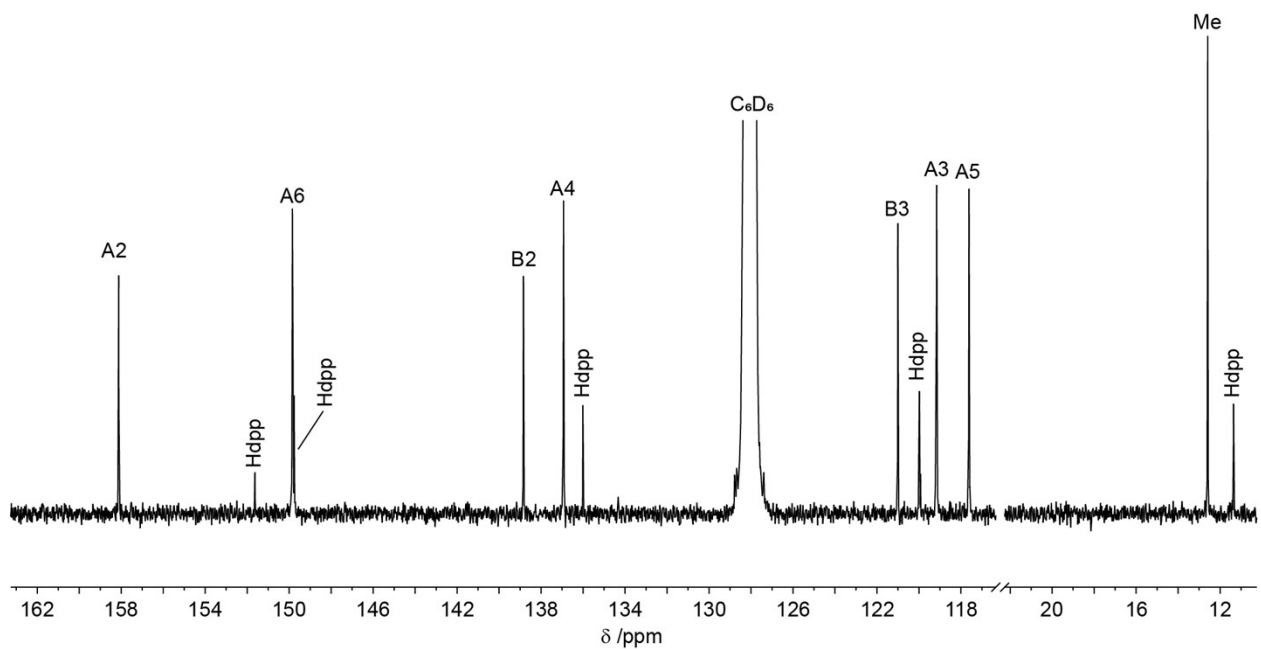

**Fig. S7.**  $^{13}\text{C}\{^1\text{H}\}$  NMR (101 MHz,  $\text{C}_6\text{D}_6$ ) spectrum of  $[\text{La}^{(\text{Me,Me dpp})}_3]$ .

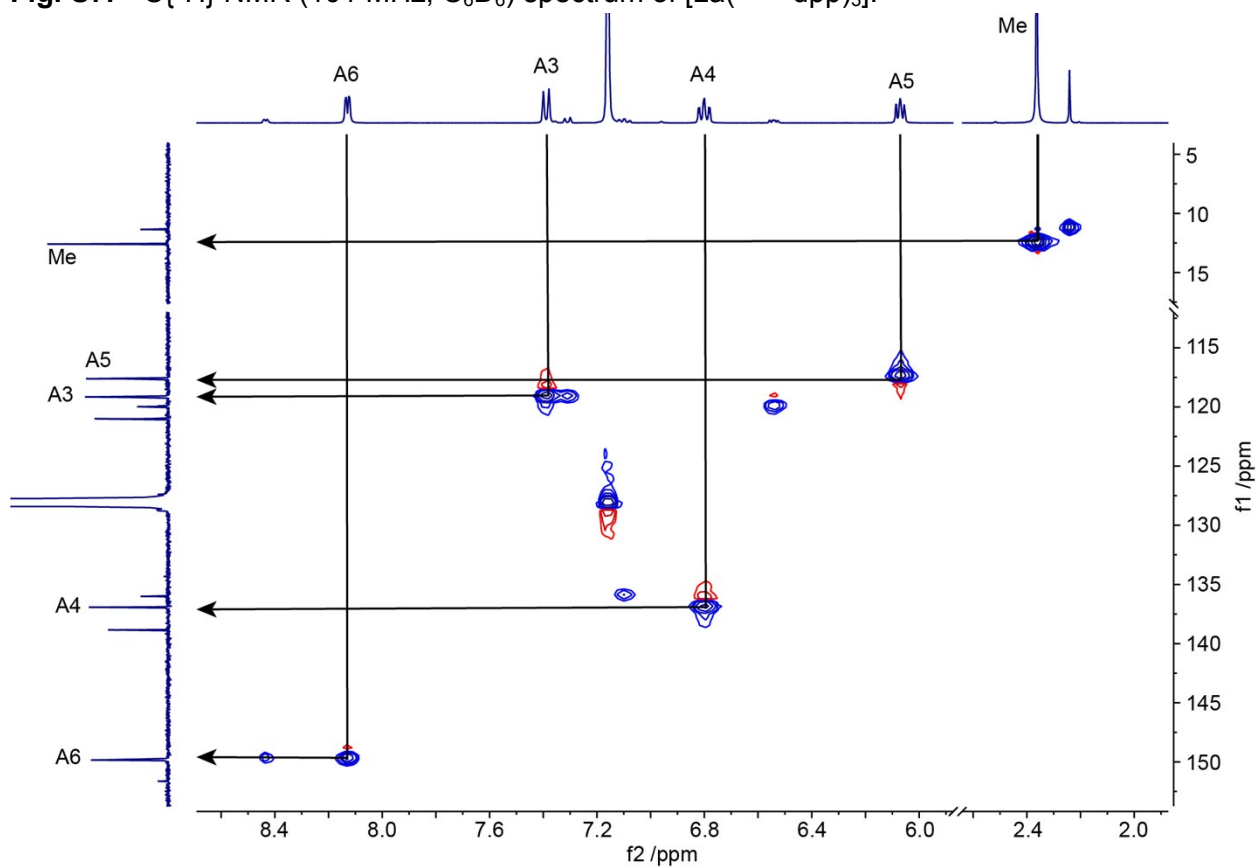

**Fig S8.**  $^1\text{H}\text{-}^{13}\text{C}\{^1\text{H}\}$  HSQC NMR (400 MHz, 101 MHz,  $\text{C}_6\text{D}_6$ ) spectrum of  $[\text{La}^{(\text{Me,Me dpp})}_3]$ .

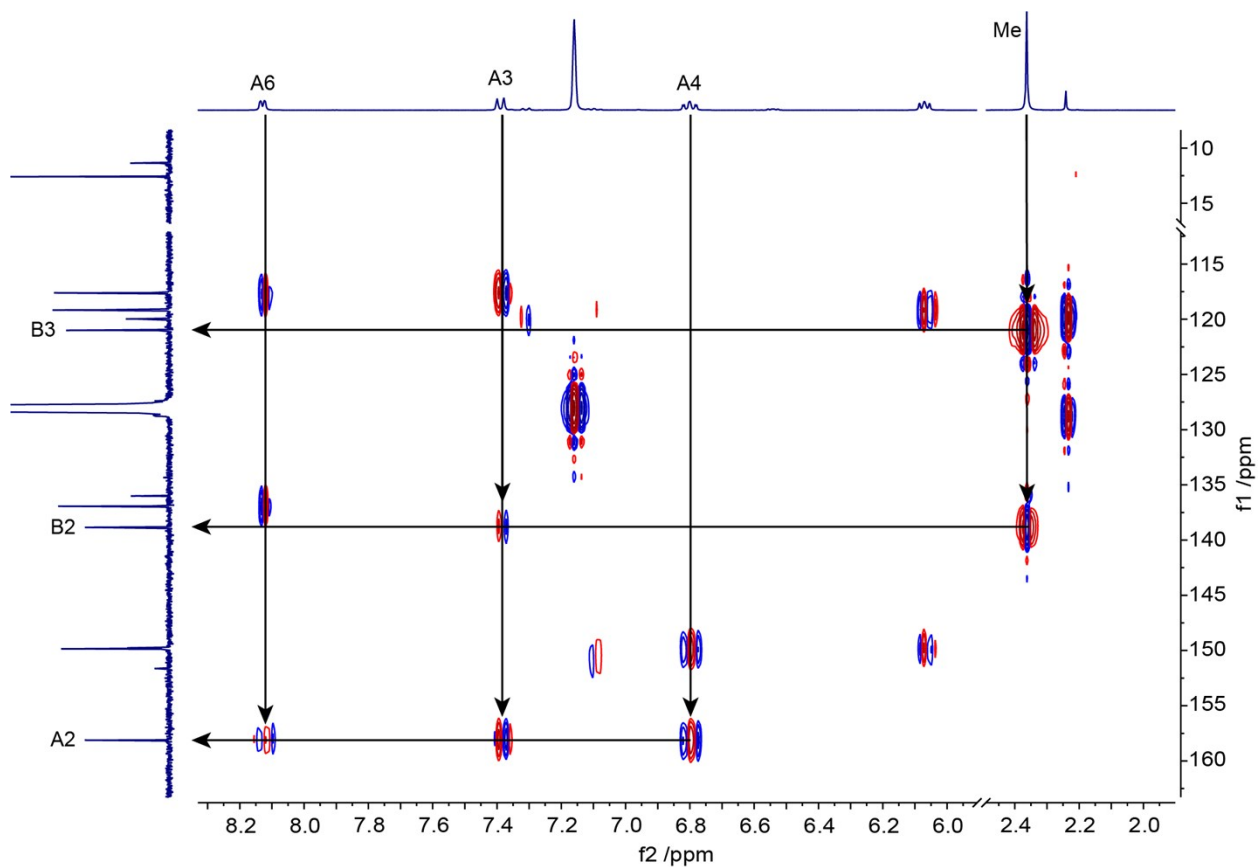

**Fig S9.**  $^1\text{H}$ - $^{13}\text{C}\{^1\text{H}\}$  HMBC NMR (400 MHz, 101 MHz,  $\text{C}_6\text{D}_6$ ) spectrum of  $[\text{La}(\text{Me,Me)dpp}]_3$ .

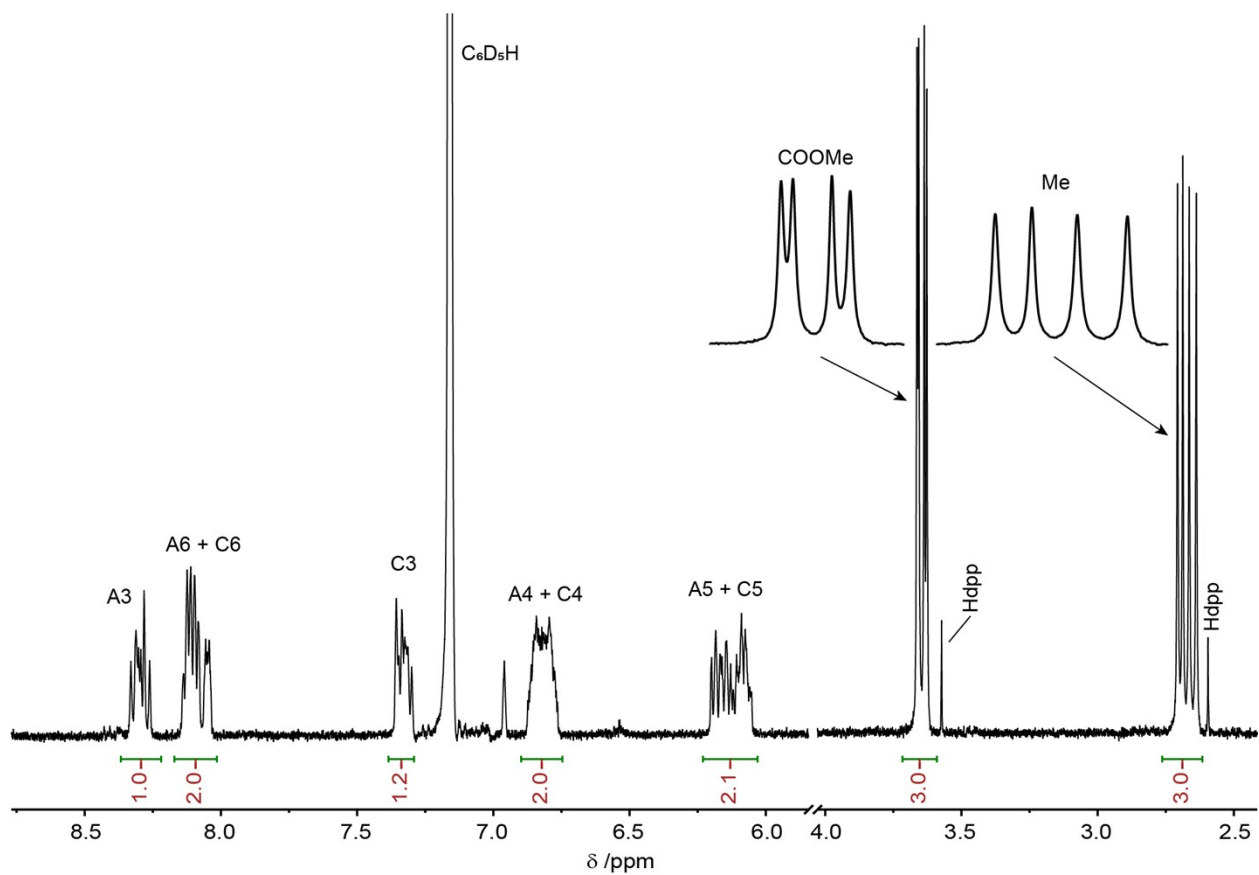

**Fig S10.**  $^1\text{H}$  NMR (400 MHz,  $\text{C}_6\text{D}_6$ ) spectrum of  $[\text{La}(\text{dpp}^{\text{CO}_2\text{Me,Me}})]_3$ .

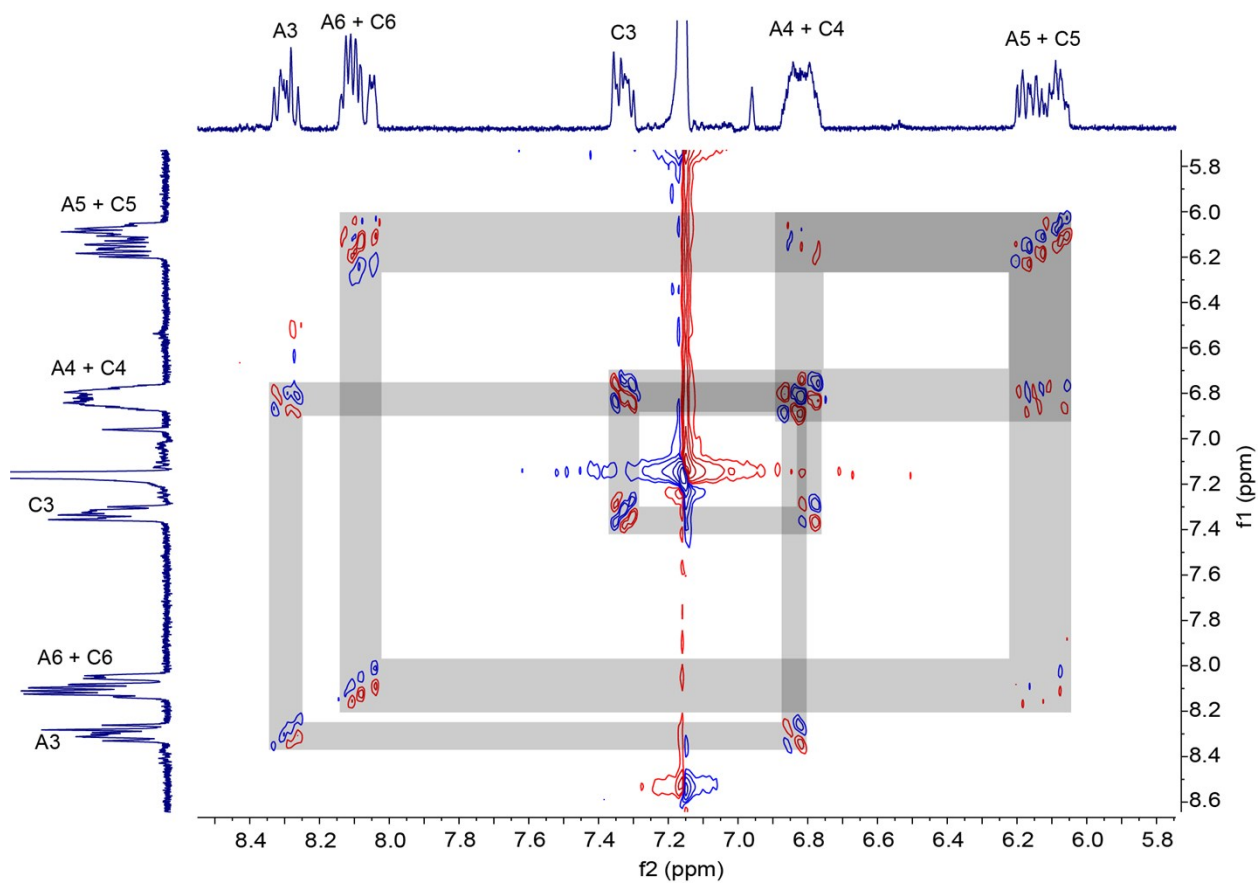

**Fig S11.**  $^1\text{H}$ - $^1\text{H}$  COSY NMR (400 MHz,  $\text{C}_6\text{D}_6$ ) spectrum of  $[\text{La}(\text{dpp}^{\text{CO}_2\text{Me,Me}})_3]$ .

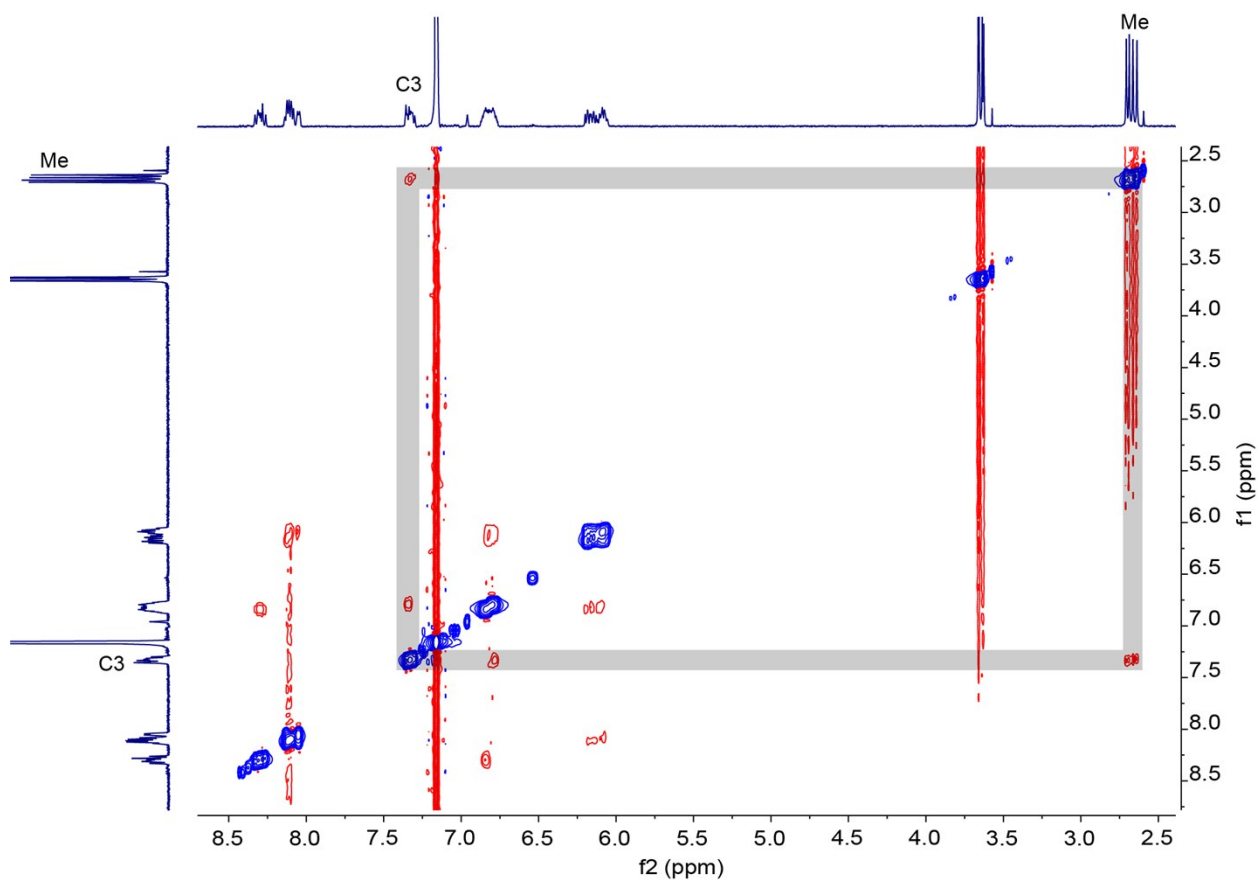

**Fig S12.**  $^1\text{H}$ - $^1\text{H}$  nOeSY NMR (400 MHz,  $\text{C}_6\text{D}_6$ ) spectrum of  $[\text{La}(\text{dpp}^{\text{CO}_2\text{Me,Me}})_3]$ .



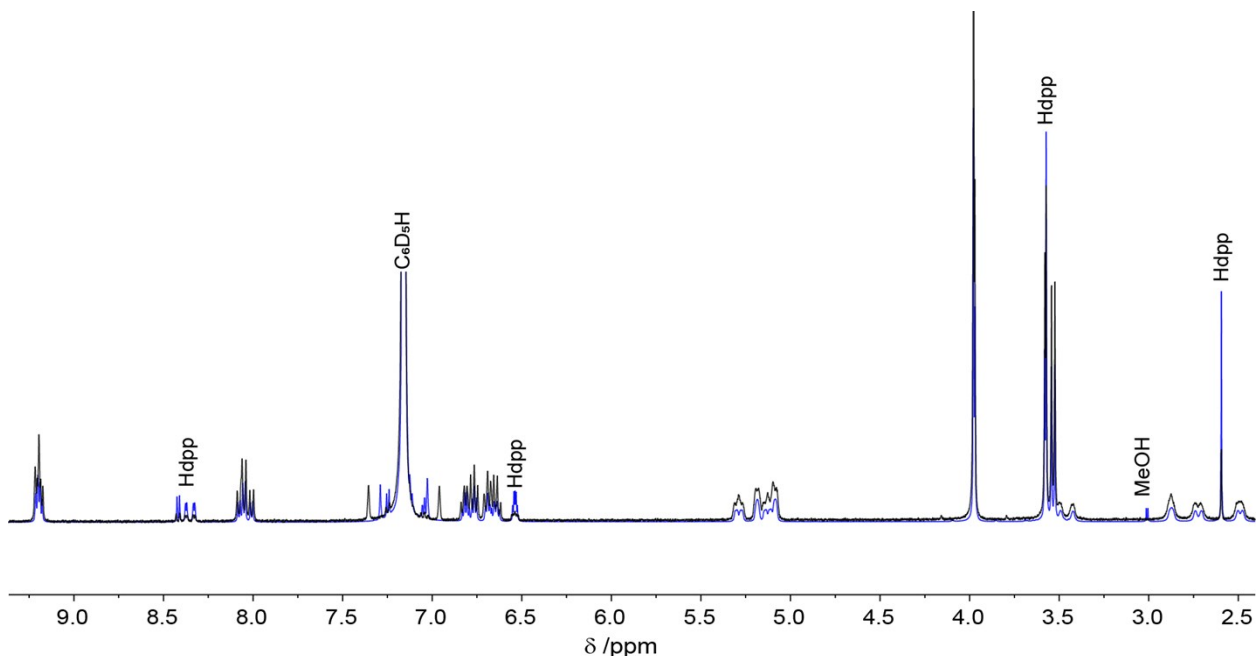

**Fig. S13.** Superimposed  $^1\text{H}$  NMR ( $\text{C}_6\text{D}_6$ ) spectra of solutions of  $[\text{Sm}(\text{dpp}^{\text{CO}_2\text{Me,Me}})_3]$  prepared separately at different fields (600 MHz in blue, 400 MHz in black).

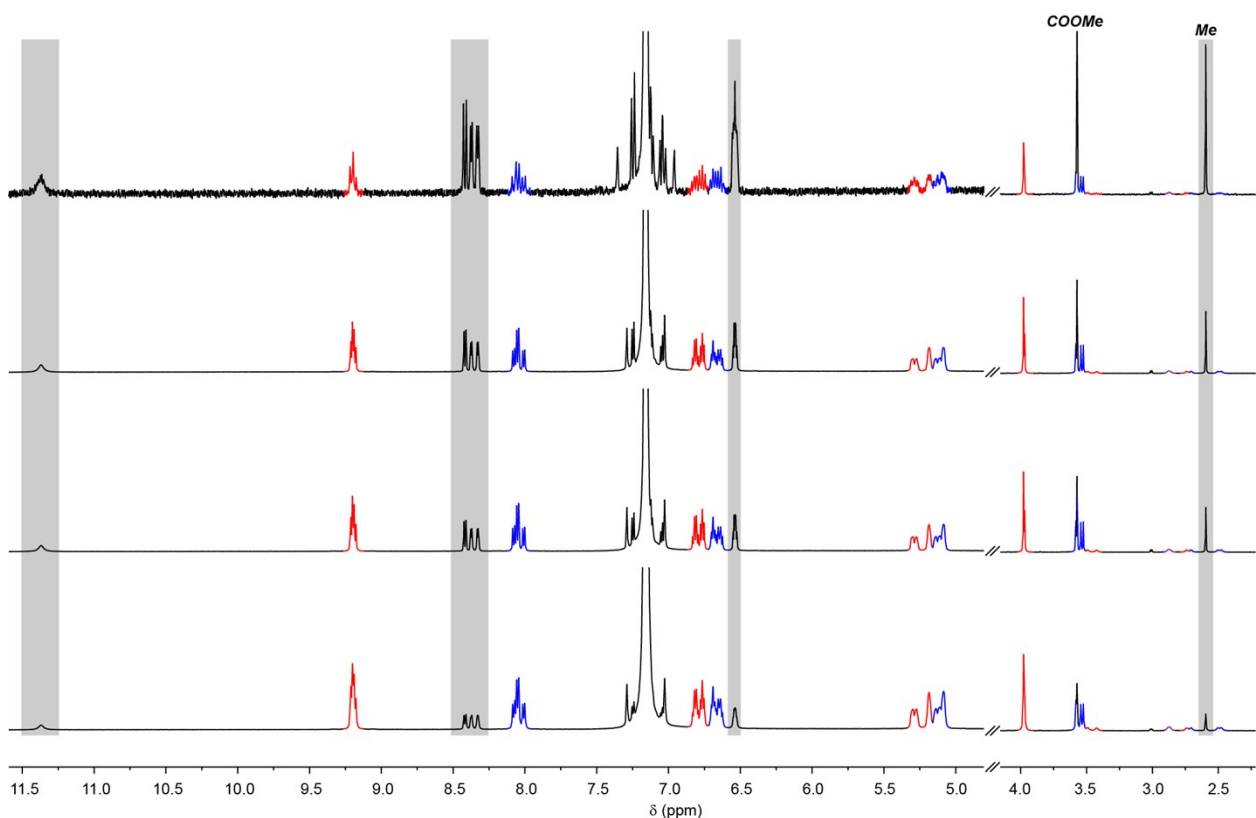

**Fig. S14.** From bottom to top,  $^1\text{H}$  NMR ( $\text{C}_6\text{D}_6$ ) spectra of  $[\text{Sm}(\text{dpp}^{\text{CO}_2\text{Me,Me}})_3]$ : after 20 minutes in solution (600 MHz, bottom),  $[\text{Sm}(\text{dpp}^{\text{CO}_2\text{Me,Me}})_3]$  after 4 hours in solution (600 MHz, second from the bottom), after 12 hours in solution (600 MHz, second from the top); and after 9 days in solution (400 MHz, top). Selected signals, which correspond to unbound  $\text{Hdpp}^{\text{CO}_2\text{Me,Me}}$  and increase over time, have been highlighted by grey regions, while the signals assigned to the  $[\text{Sm}(\text{dpp}^{\text{CO}_2\text{Me,Me}})_3]$  complex (and decrease over time) are coloured red and blue according to their assignment (Fig. X) for clarity. Note – a break in scale occurs between 4–5 ppm.

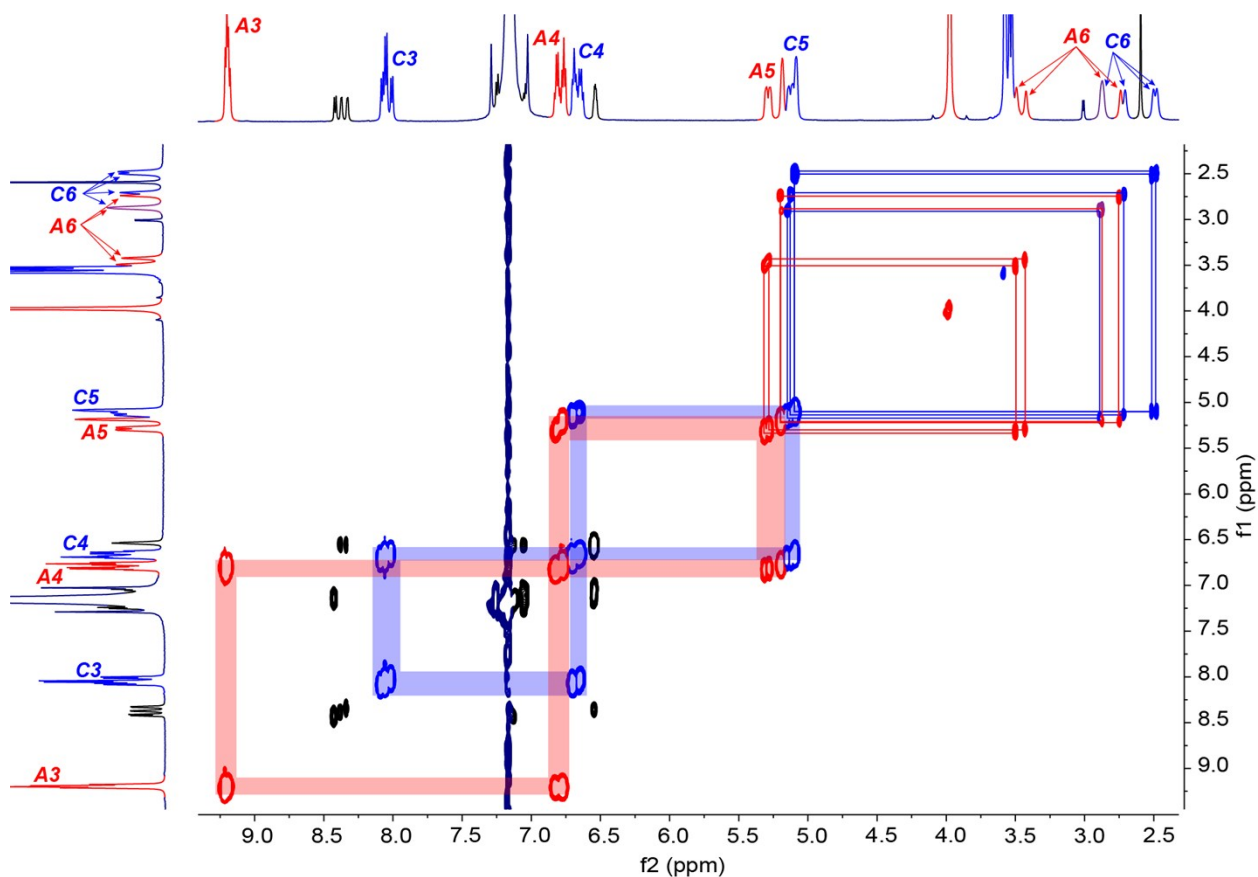

**Fig. S15.**  $^1\text{H}$ - $^1\text{H}$  COSY NMR (600 MHz,  $\text{C}_6\text{D}_6$ ) of  $[\text{Sm}(\text{dpp}^{\text{CO}_2\text{Me,Me}})_3]$ . In black are signals corresponding to free  $\text{Hdpp}^{\text{CO}_2\text{Me,Me}}$  which has dissociated during the course of the solution state NMR studies.

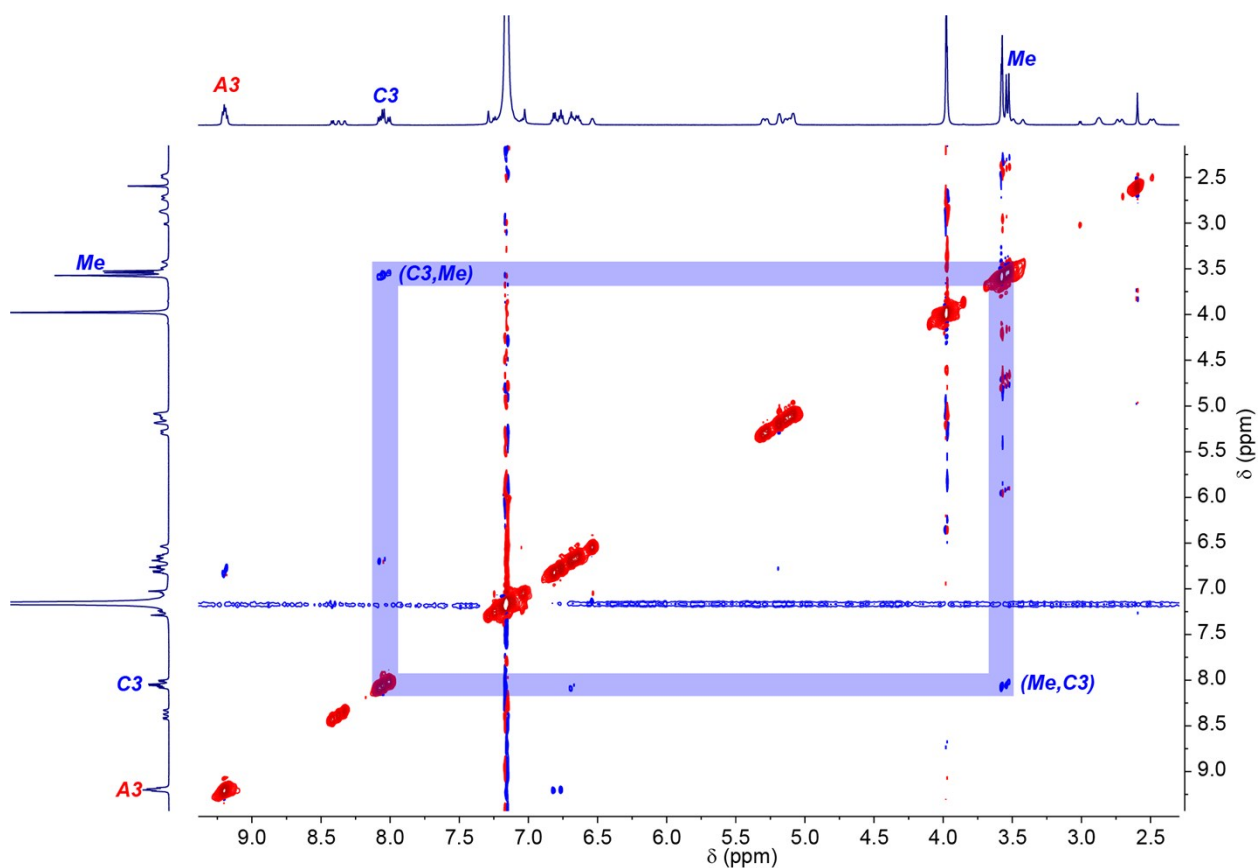

**Fig. S16.**  $^1\text{H}$ - $^1\text{H}$  nOeSY NMR (600 MHz,  $\text{C}_6\text{D}_6$ ) of  $[\text{Sm}(\text{dpp}^{\text{CO}_2\text{Me,Me}})_3]$  highlighting the key nOe interactions (opposite phase to diagonal peaks) between C3 and the 4-methyl pyrrolide proton environments.

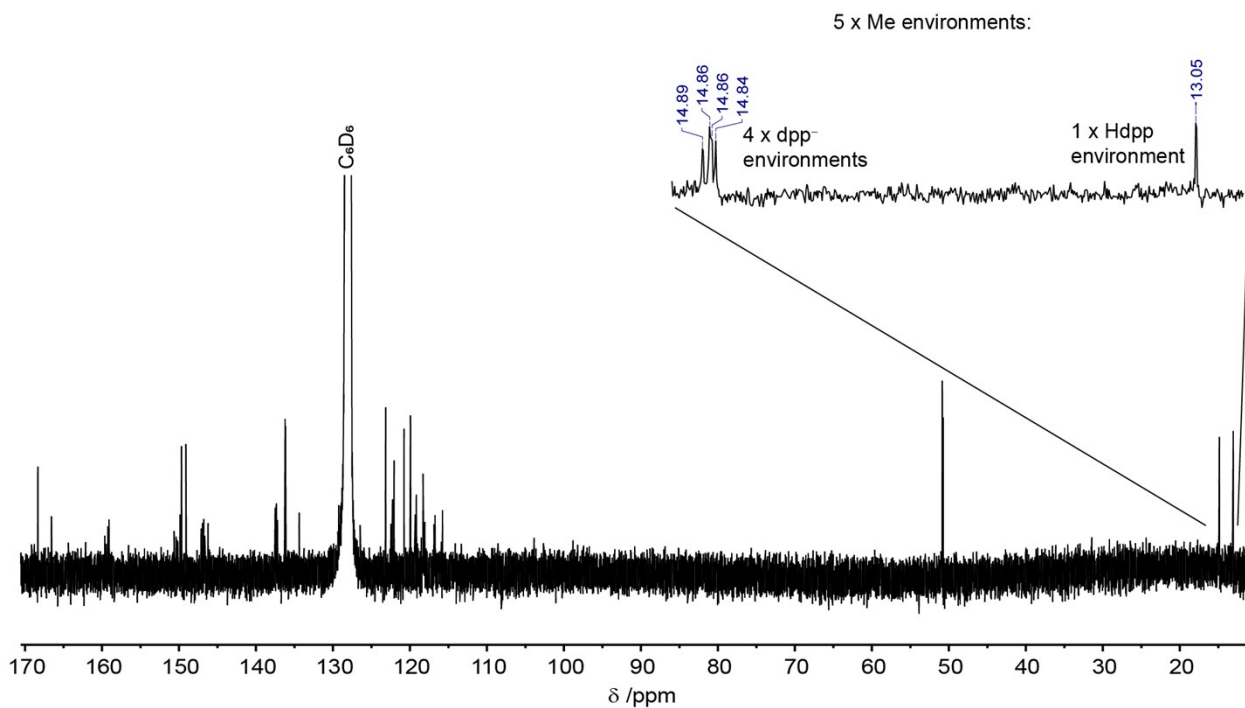

**Fig. S17.**  $^{13}\text{C}\{^1\text{H}\}$  NMR (151 MHz,  $\text{C}_6\text{D}_6$ ) spectrum for  $[\text{Sm}(\text{dpp}^{\text{CO}_2\text{Me,Me}})_3]$ . Shown inset are the five  $^{13}\text{C}$  environments associated with the pyrrole methyl substituent.

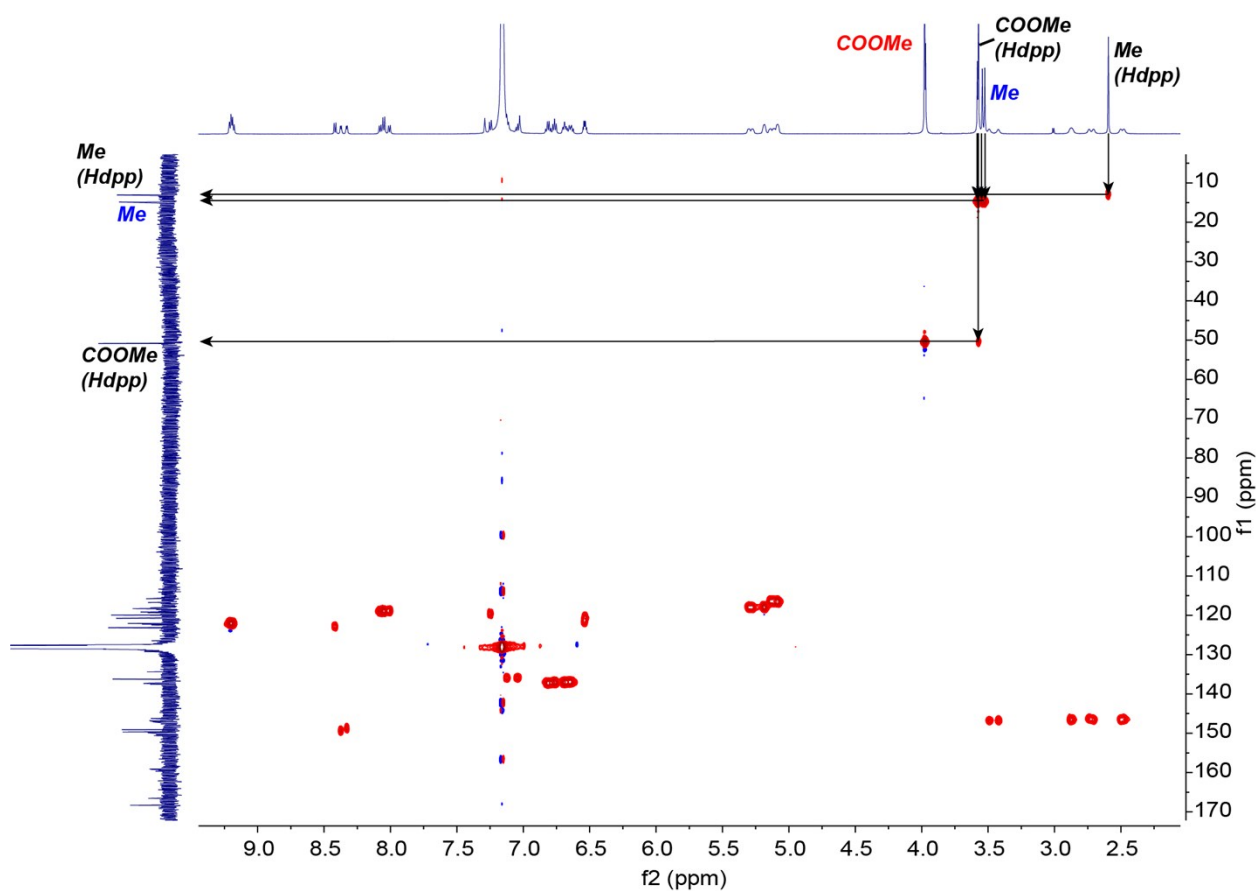

**Fig. S18.**  $^1\text{H}$ - $^{13}\text{C}$  HSQC NMR (600 MHz, 151 MHz,  $\text{C}_6\text{D}_6$ ) spectrum of  $[\text{Sm}(\text{dpp}^{\text{CO}_2\text{Me,Me}})_3]$ .

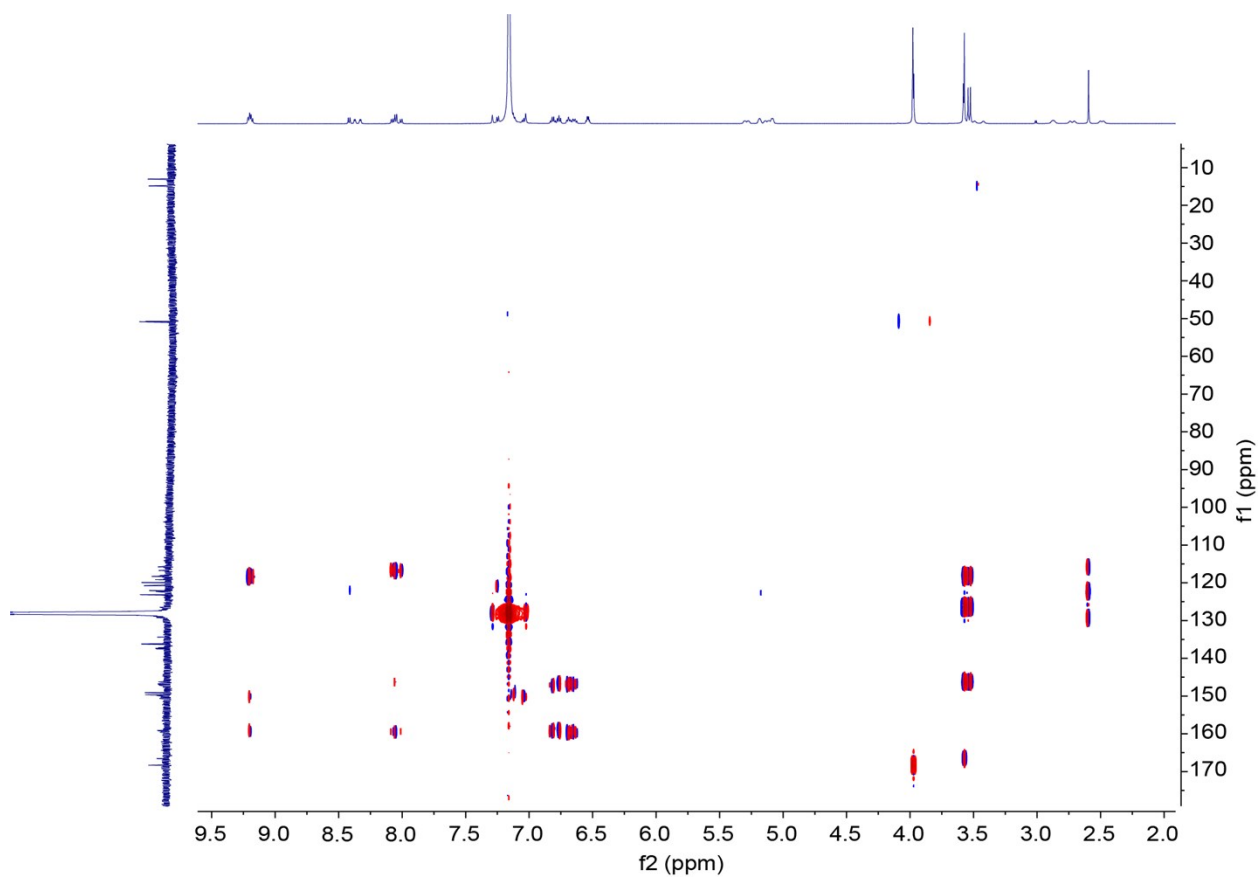

**Fig. S19.**  $^1\text{H}$ - $^{13}\text{C}$  HMBC NMR (600 MHz, 151 MHz,  $\text{C}_6\text{D}_6$ ) spectrum of  $[\text{Sm}(\text{dpp}^{\text{CO}_2\text{Me,Me}})_3]$ .

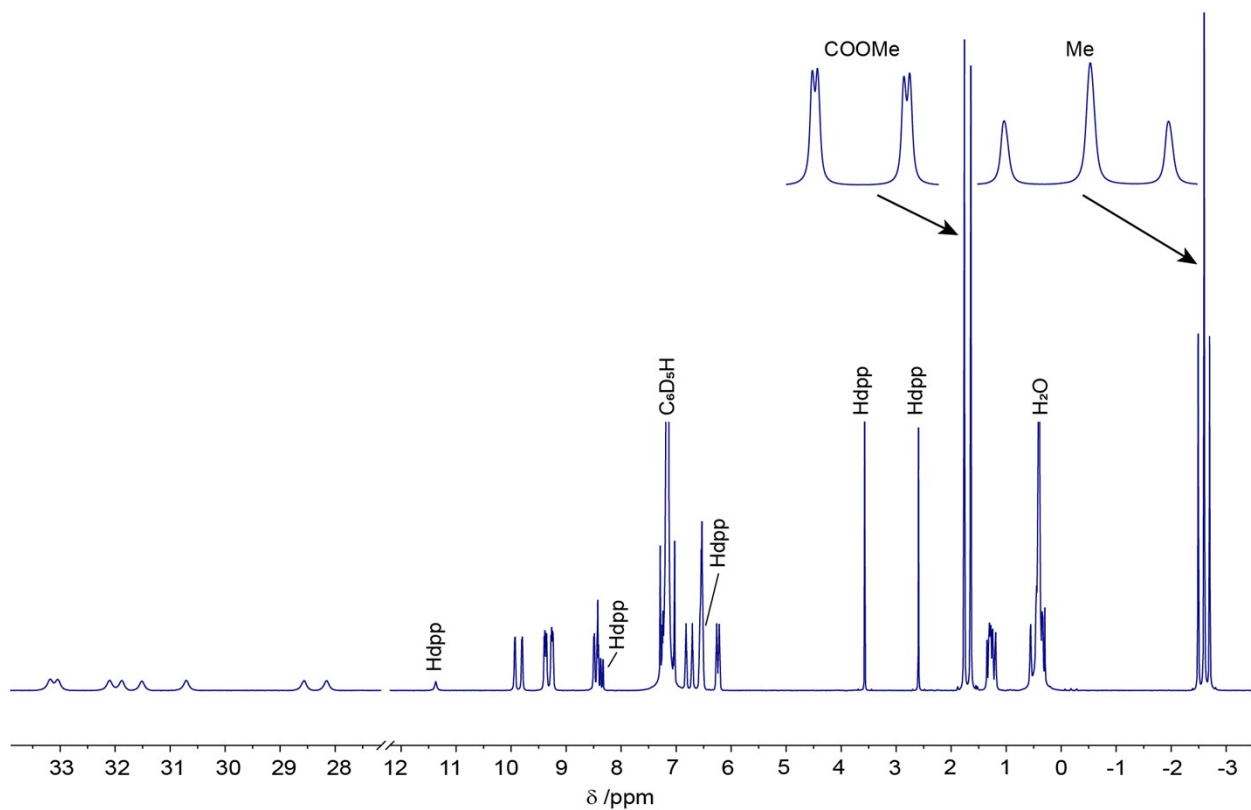

**Fig. S20.**  $^1\text{H}$  NMR (400 MHz,  $\text{C}_6\text{D}_6$ ) spectrum of  $[\text{Eu}(\text{dpp}^{\text{CO}_2\text{Me,Me}})_3]$ .

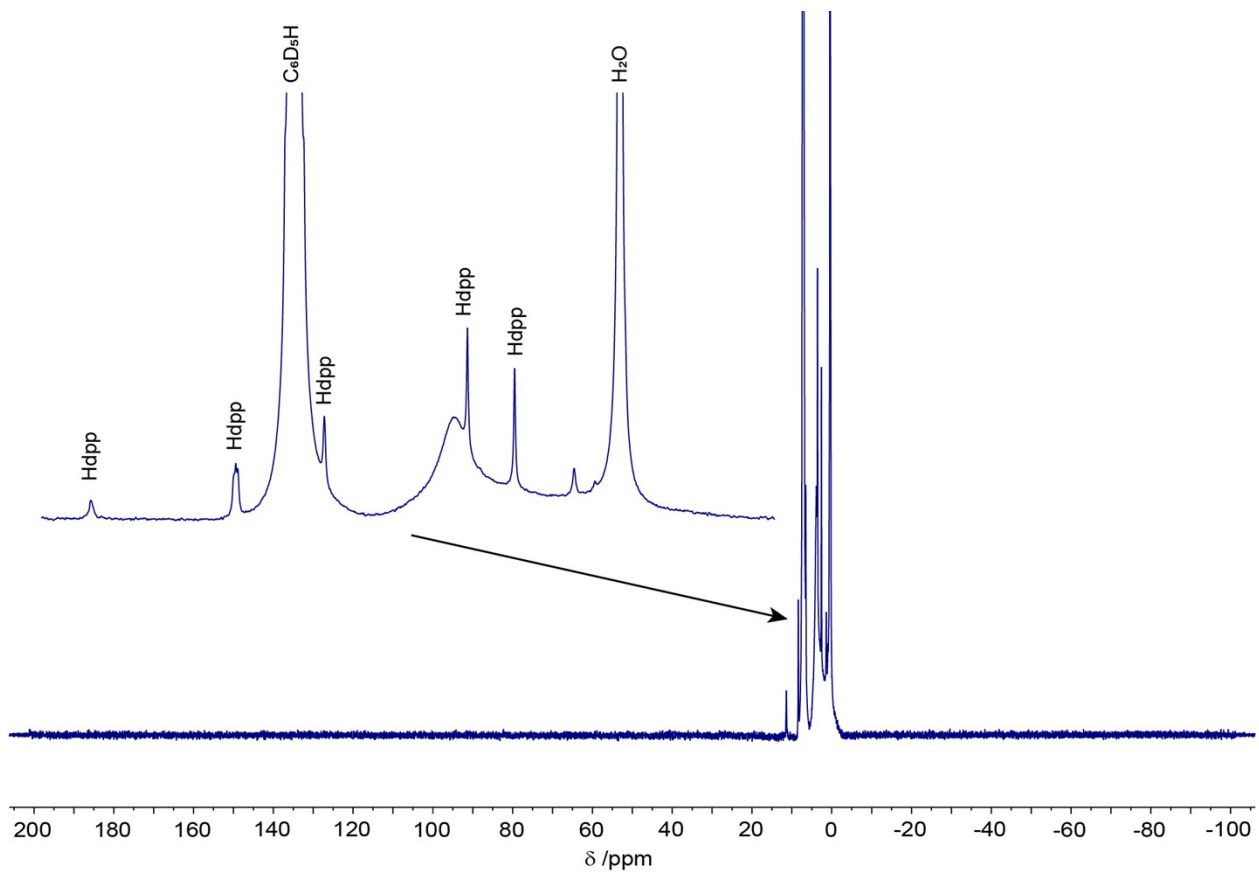

**Fig. S21.**  $^1\text{H}$  NMR (400 MHz,  $\text{C}_6\text{D}_6$ ) spectrum of  $[\text{Gd}(\text{dpp}^{\text{CO}_2\text{Me,Me}})_3]$ .

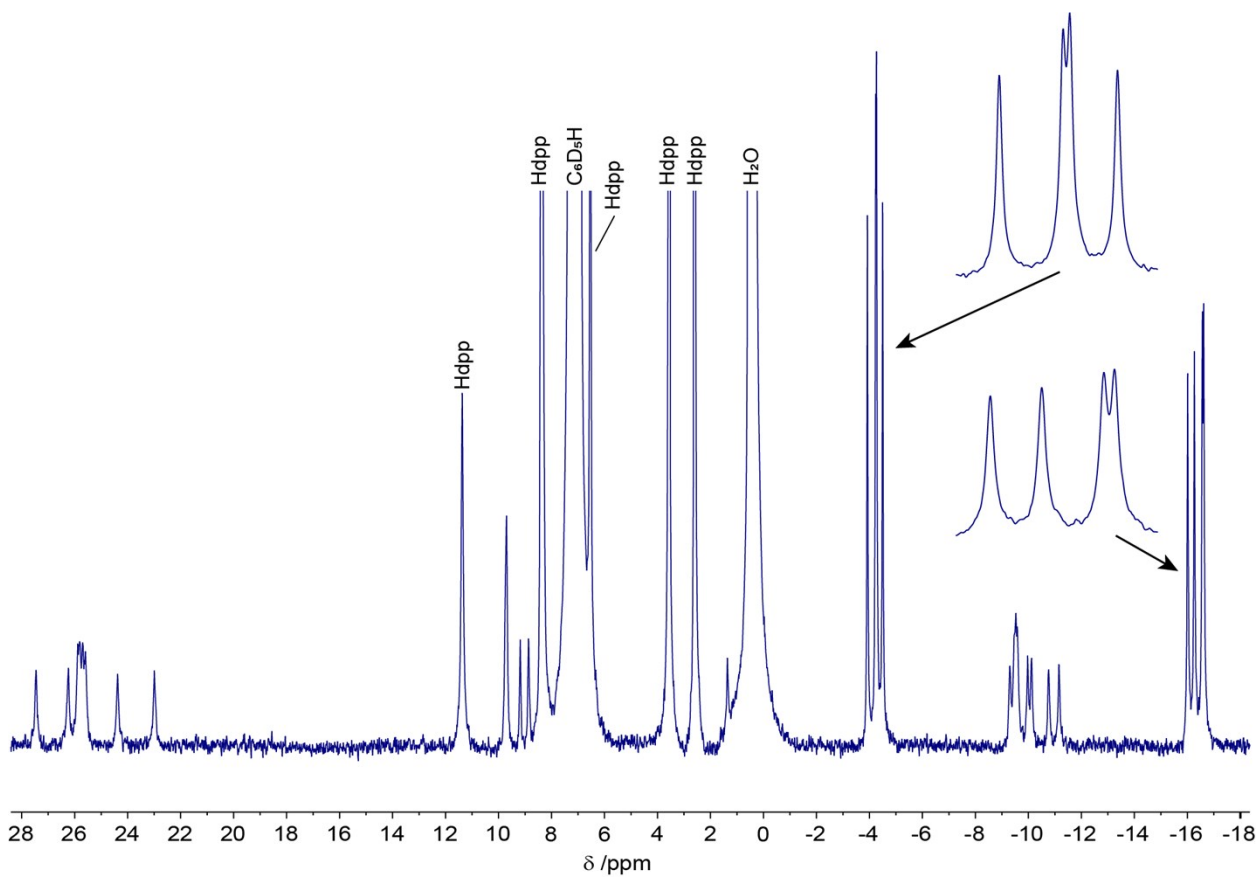

**Fig. S22.**  $^1\text{H}$  NMR (400 MHz,  $\text{C}_6\text{D}_6$ ) spectrum of  $[\text{Yb}(\text{dpp}^{\text{CO}_2\text{Me,Me}})_3]$ .

# Mass Spectra

JM-2-19-1 #1-35 RT: 0.01-1.00 AV: 35 NL: 1.99E8  
T: FTMS + c NSI Full ms [150.00-2000.00]

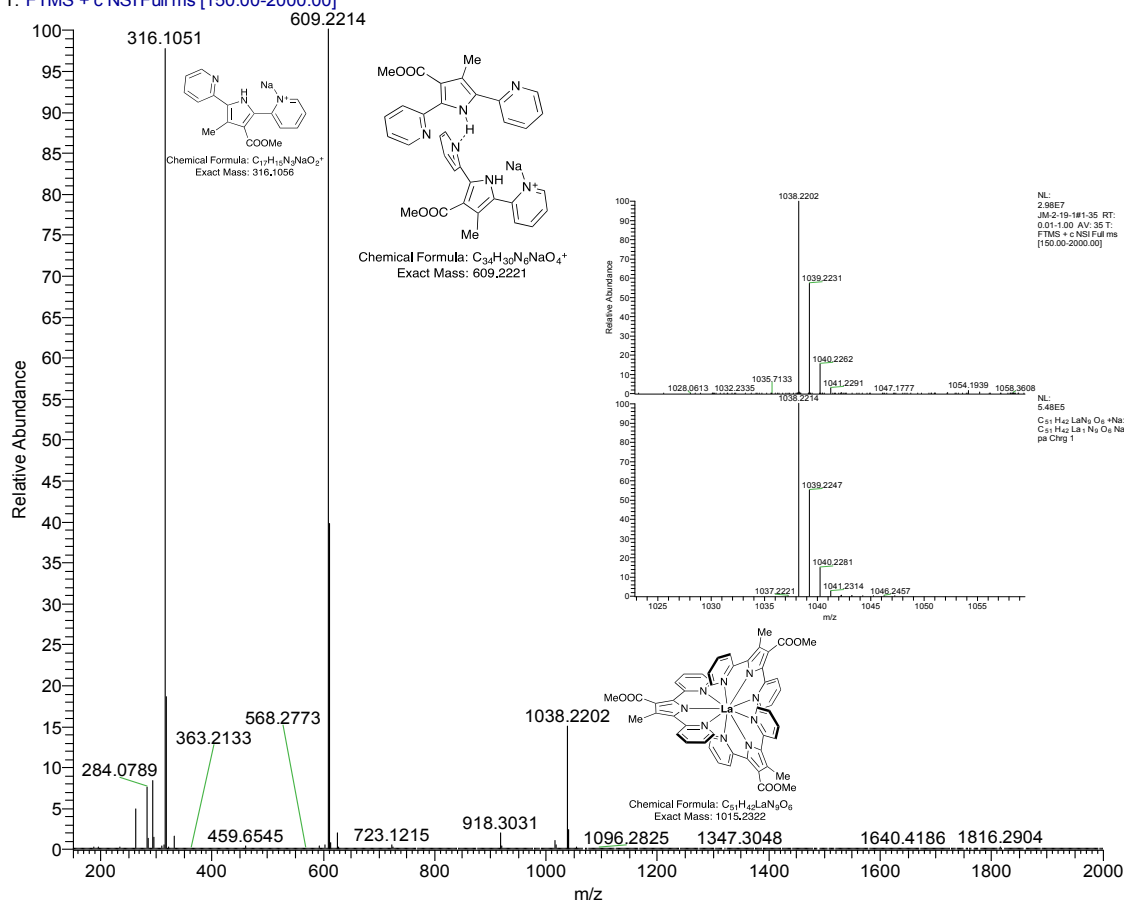

**Fig. S23.** (+)-HR-NSI-MS of  $[La(dpp^{CO_2Me,Me})_3]$  in acetonitrile. Shown inset is the observed isotopomers (top) against the simulated isotopic distribution for  $[La(dpp^{CO_2Me,Me})_3 + Na]^+$ .

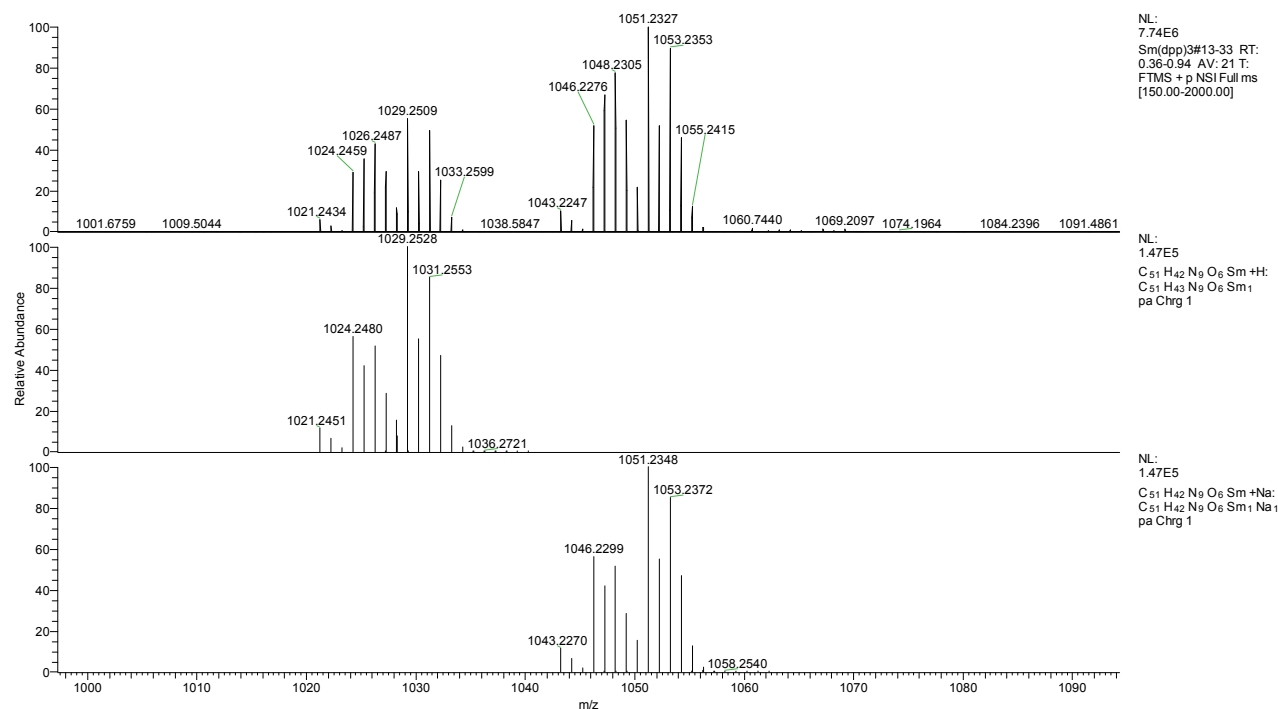

**Fig. S24.** (+)-HR-NSI-MS of  $[Sm(dpp^{CO_2Me,Me})_3]$  in acetonitrile (top), against the simulated isotopic distribution for  $[Sm(dpp^{CO_2Me,Me})_3 + H]^+$  (middle) and  $[Sm(dpp^{CO_2Me,Me})_3 + Na]^+$  (bottom).

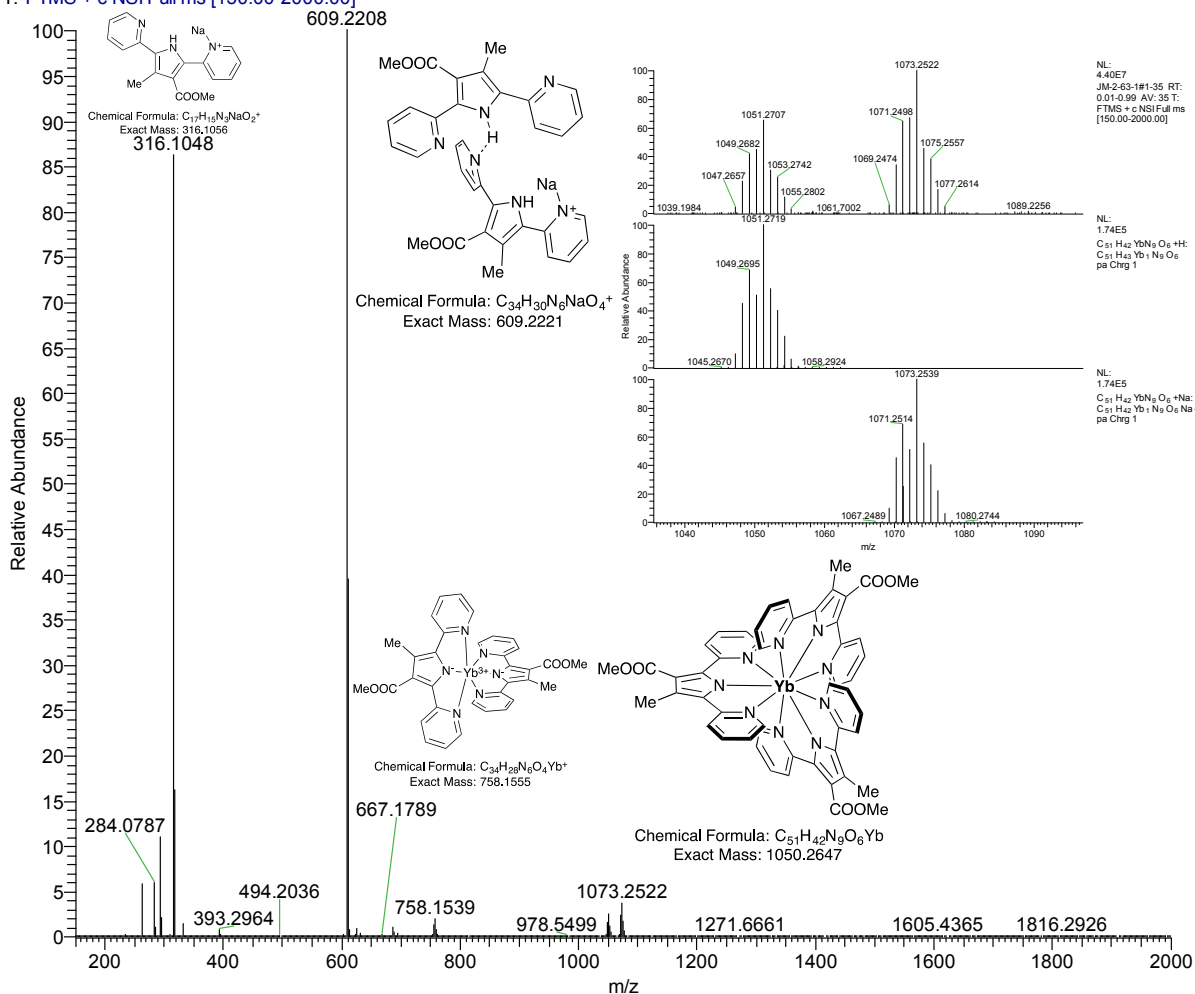

**Fig. S25.** (+)-HR-NSI-MS of  $[Yb(dpp^{CO_2Me,Me})_3]$  in acetonitrile. Shown inset is the observed isotopomers (top) against the simulated isotopic distribution for  $[Yb(dpp^{CO_2Me,Me})_3 + H]^+$  (middle) and for  $[Yb(dpp^{CO_2Me,Me})_3 + Na]^+$  (bottom).

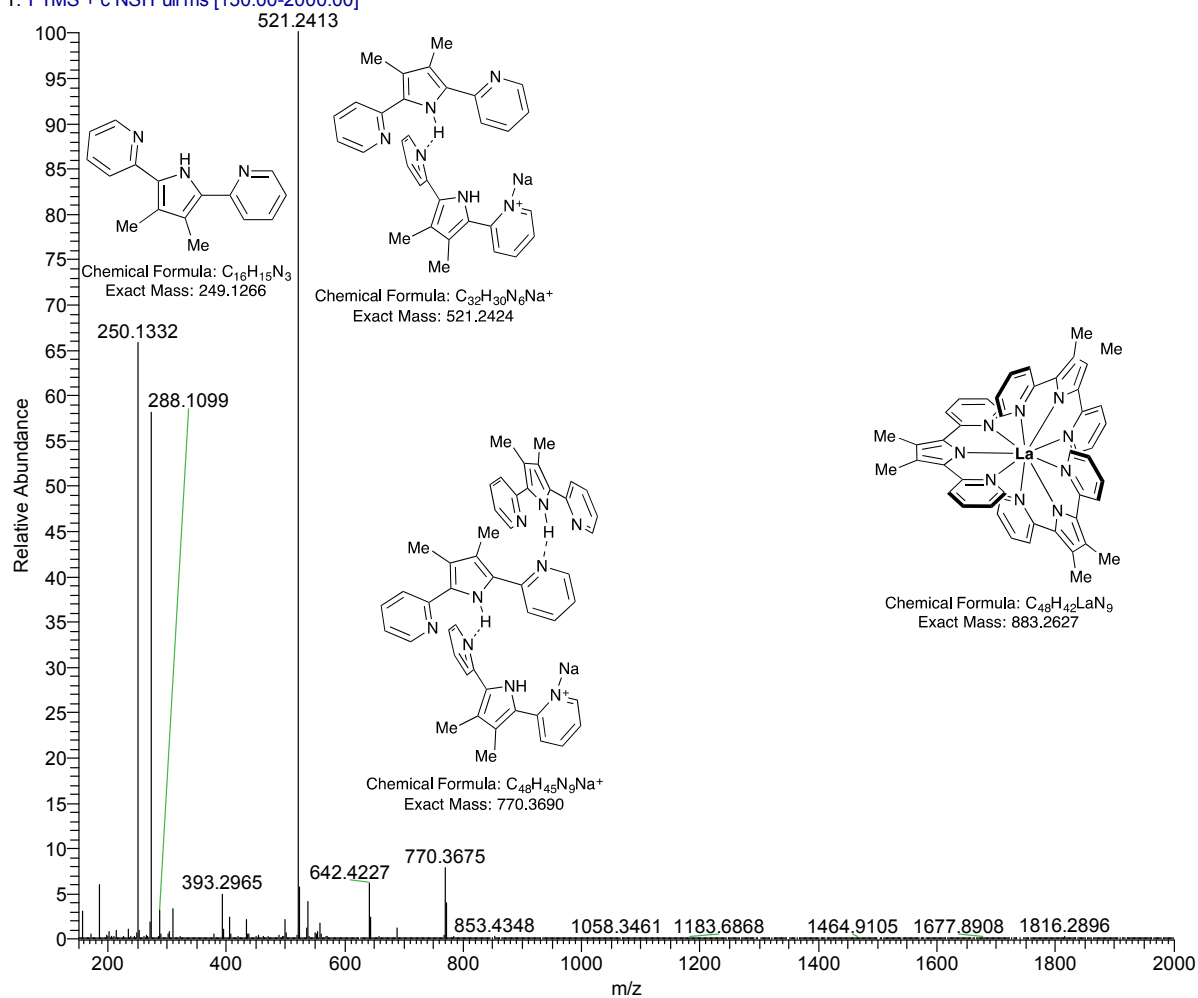

Fig. S26. (+)-HR-NSI-MS of  $[La(dpp^{Me,Me})_3]$  in acetonitrile.



## Photophysical studies

[Eu(dpp)<sub>3</sub>]:

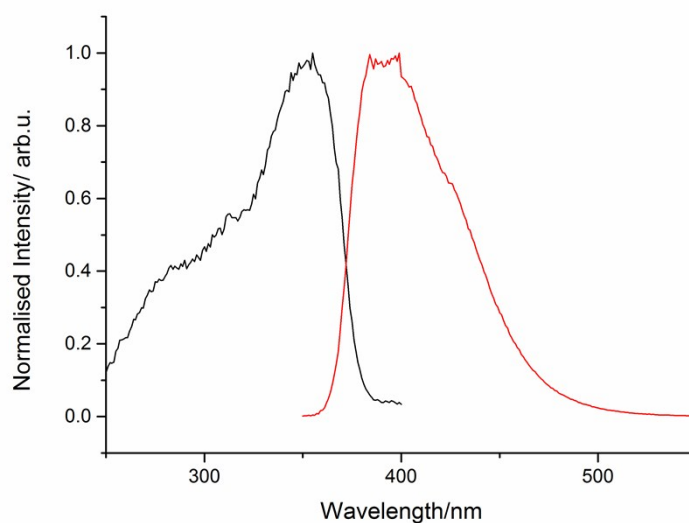

**Fig. S27.** Normalised excitation ( $\lambda_{em} = 612$  nm) and emission ( $\lambda_{exc} = 300$  nm) spectra of [Eu(dpp)<sub>3</sub>] in CH<sub>2</sub>Cl<sub>2</sub> at room temperature.

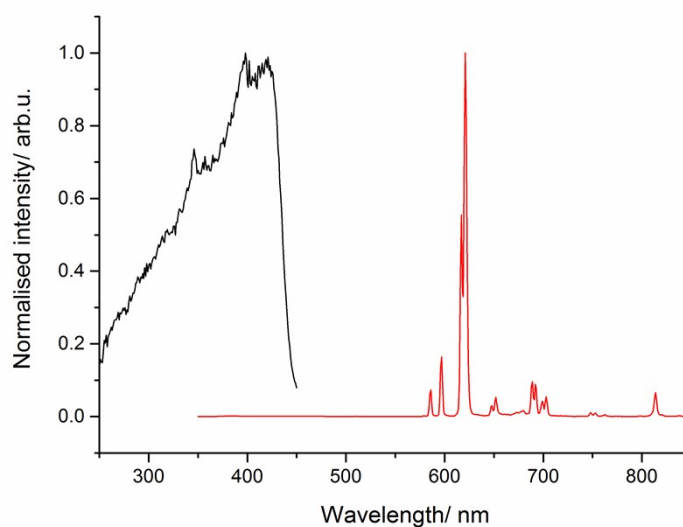

**Fig. S28.** Normalised excitation ( $\lambda_{em} = 612$  nm) and emission ( $\lambda_{exc} = 300$  nm) spectra of [Eu(dpp)<sub>3</sub>] in CH<sub>2</sub>Cl<sub>2</sub> at 77K.

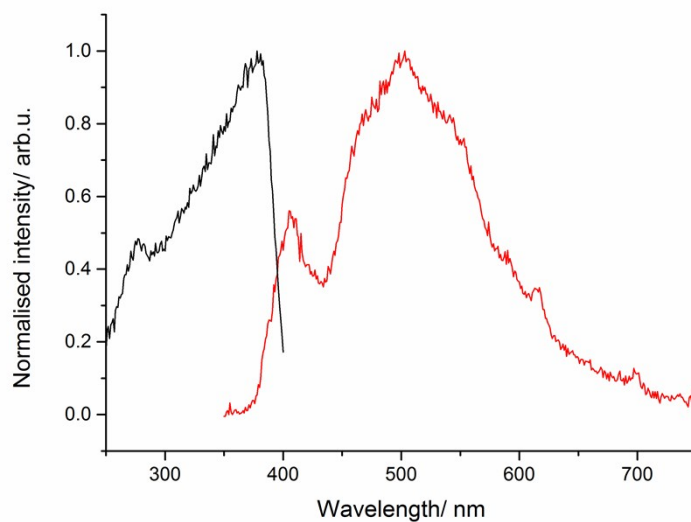

**Fig. S29.** Normalised excitation ( $\lambda_{em} = 612 \text{ nm}$ ) and emission ( $\lambda_{exc} = 300 \text{ nm}$ ) spectra of  $[\text{Eu}(\text{dpp})_3]$  in the solid state.

$[\text{Yb}(\text{dpp})_3]$ :

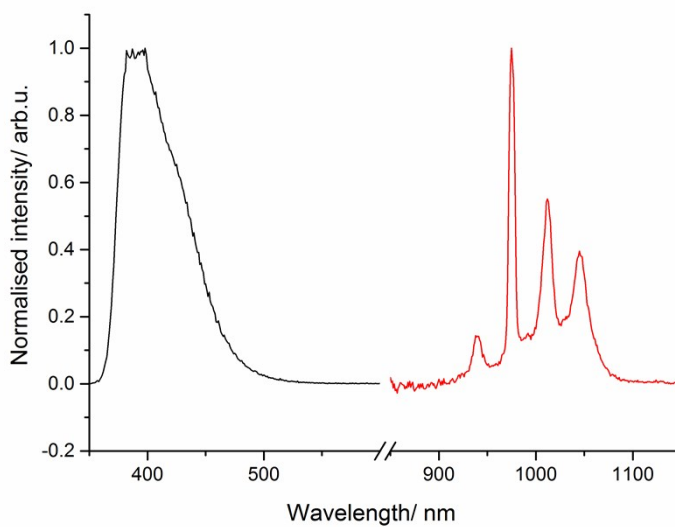

**Fig. S30.** Normalised excitation ( $\lambda_{em} = 980 \text{ nm}$ ) and emission ( $\lambda_{exc} = 300 \text{ nm}$ ) spectra of  $[\text{Yb}(\text{dpp})_3]$  in  $\text{CH}_2\text{Cl}_2$  at room temperature.

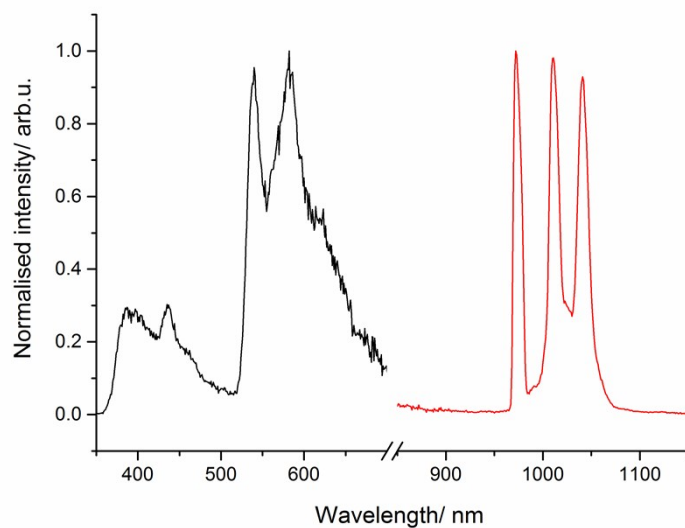

**Fig. S31.** Normalised excitation ( $\lambda_{em} = 980$  nm) and emission ( $\lambda_{exc} = 300$  nm) spectra of  $[Yb(dpp)_3]$  in  $CH_2Cl_2$  at 77K.

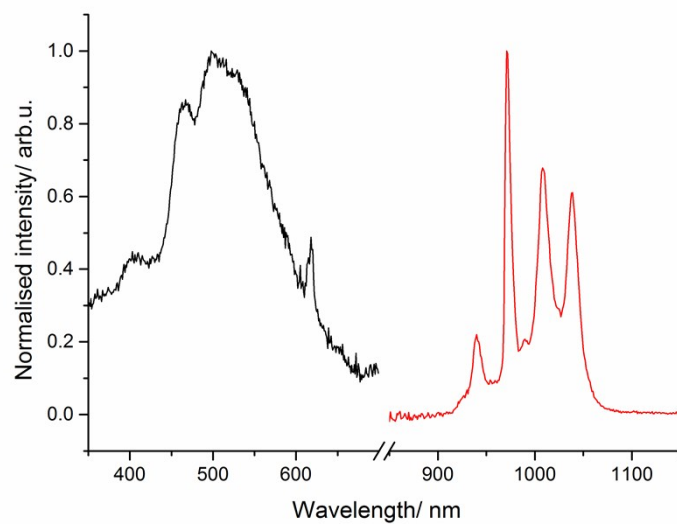

**Fig. S32.** Normalised excitation ( $\lambda_{em} = 980$  nm) and emission ( $\lambda_{exc} = 300$  nm) spectra of  $[Yb(dpp)_3]$  in the solid state.

## Cyclic Voltammetry

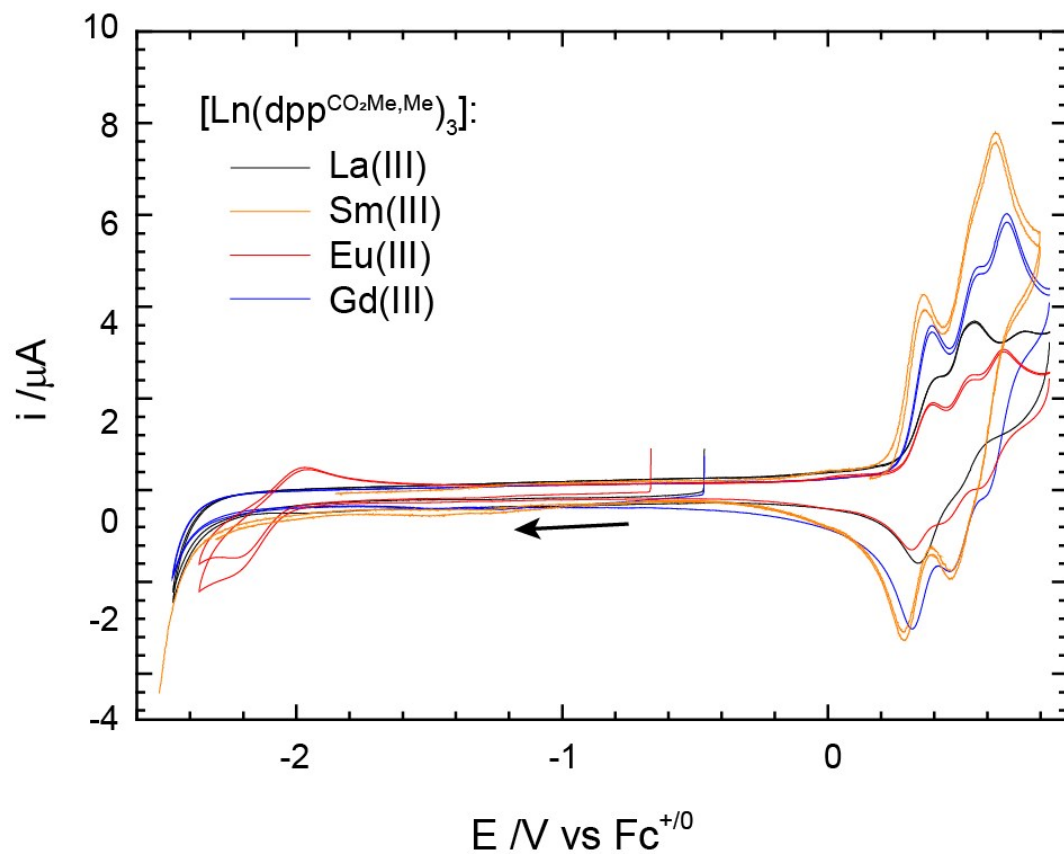

**Fig. S33.** Overlay of CVs for  $[\text{Ln}(\text{dpp}^{\text{CO}_2\text{Me},\text{Me}})_3]$  (Ln = La(III), black trace; Sm(III), orange trace; Eu(III), red trace; and Gd(III), blue trace).

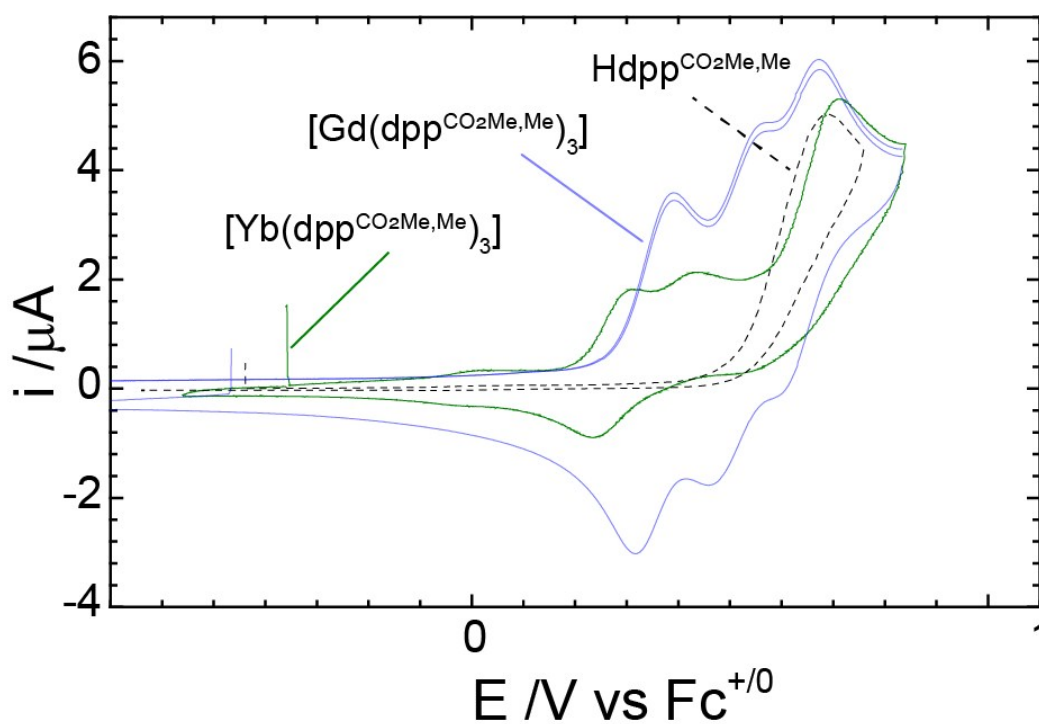

**Fig. S34.** CV of  $[\text{Yb}(\text{dpp}^{\text{CO}_2\text{Me},\text{Me}})_3]$  (green trace) overlaid onto those for  $[\text{Gd}(\text{dpp}^{\text{CO}_2\text{Me},\text{Me}})_3]$  (transparent blue trace) and  $\text{Hdpp}^{\text{CO}_2\text{Me},\text{Me}}$  (dashed black trace).
